# Supplementary material for: Merging visible-light photoredox and copper catalysis in catalytic aerobic oxidation of amines to nitriles
Source: Royal Society of Chemistry journal article supplement (doi:10.1039/c6ob02510b), 2016-11-30

## Supporting Information

### Merging visible-light photoredox and copper catalysis in catalytic aerobic oxidation of amines to nitriles

Chuanzhou Tao<sup>a,b\*</sup>, Bin Wang<sup>a</sup>, Lei Sun<sup>a</sup>, Zhou Liu<sup>a</sup>, Yadong Zhai<sup>a</sup>, Xiulian Zhang<sup>a</sup>, Jian Wang<sup>a</sup>

<sup>a</sup> School of Chemical Engineering, Huaihai Institute of Technology, Lianyungang 222005, P. R. of China

<sup>b</sup> Jiangsu Key Laboratory of Marine Pharmaceutical Compound Screening, Lianyungang 222005, P. R. of China

#### General experimental:

All reactions were performed under an oxygen atmosphere (purity  $\geq 99.999\%$ ) using standard Schlenk-type glasswares on a dual-manifold Schlenk line. Flash column chromatography was performed on silica 230 – 400 mesh.  $^1\text{H-NMR}$  and  $^{13}\text{C-NMR}$  spectra were recorded on Bruker Advance 500 and Bruker Advance 300 spectrometer at ambient temperature in  $\text{CDCl}_3$ . Chemical shift values ( $\delta$ ) are reported in ppm and calibrated to tetramethylsilane (TMS, 0.00 ppm) or residual solvent (7.26 ppm in  $\text{CDCl}_3$ ) for  $^1\text{H NMR}$  and to  $\text{CDCl}_3$  (77.16 ppm) for  $^{13}\text{C NMR}$ . Gas chromatographic (GC) analysis was acquired on a JieDao TECH GC-1690 equipped with a flame-ionization detector. GC yields of the reactions were determined with naphthalene as the internal standard.

The photocatalyst of  $\text{Ru}(\text{bpy})_3\text{Cl}_2 \cdot 6\text{H}_2\text{O}$  was purchased from *J & K Scientific*. The copper catalysts and other transition metal catalysts were purchased from *Energy Chemical*. All the other reagents mentioned in this text were purchased from commercial sources and used without purification. All the solvents were refluxed with  $\text{CaH}_2$  for 12h, distilled and further dried over 4 Å activated molecular sieves for 24h under an argon atmosphere. Two 15W Blue LED lamps were used to irradiate the reaction mixtures.

#### Aerobic oxidation amines to nitriles via merging photoredox and copper catalysis: general procedure

To an oven-dried Schlenk tube were added  $\text{Ru}(\text{bpy})_3\text{Cl}_2 \cdot 6\text{H}_2\text{O}$  (0.01 mmol, 2 mol%),  $\text{CuBr}$  (0.05 mmol, 10mol%) and  $\text{LiO}^t\text{Bu}$  (0.1 mmol, 20mol%), then the tube was evacuated and backfilled with  $\text{O}_2$  (this process was repeated three times). To this Schlenk tube were added amine (0.5 mmol) and DMSO (3.0 mL). The Schlenk tube was adapted to  $\text{O}_2$  balloon, and the reaction mixture was stirred for 18h at room temperature with blue LED ( $2 \times 15\text{W}$ ) irradiation. After diluted by adding EtOAc, the reaction was quenched with aqueous  $\text{NH}_4\text{Cl}$ . The aqueous layer was extracted with EtOAc three times. The combined organic layer was washed with aqueous  $\text{NaHSO}_3$  and dried over anhydrous  $\text{MgSO}_4$ , filtered, and evaporated. The residue was purified by column chromatography afford the product. The products obtained herein are known compounds, and spectral properties of all products are consistent with literature values.

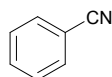

#### benzonitrile (2a):<sup>[1]</sup>

$^1\text{H NMR}$  (300 MHz,  $\text{CDCl}_3$ )  $\delta$  7.67 – 7.54 (m, 3H), 7.45 (t,  $J = 7.7$  Hz, 2H).  $^{13}\text{C NMR}$  (75 MHz,  $\text{CDCl}_3$ )  $\delta$  132.53, 131.77, 128.88, 118.51, 112.06.

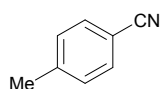

#### 4-methylbenzonitrile (2b):<sup>[2]</sup>

$^1\text{H}$  NMR (500 MHz,  $\text{CDCl}_3$ )  $\delta$  7.48 (d,  $J = 8.1$  Hz, 2H), 7.23 (t,  $J = 7.1$  Hz, 2H), 2.38 (s, 3H).  $^{13}\text{C}$  NMR (125 MHz,  $\text{CDCl}_3$ )  $\delta$  143.56, 131.83, 129.71, 118.95, 109.16, 21.60.

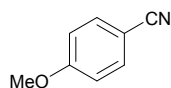

**4-methoxybenzonitrile (2c):**<sup>[2]</sup>

$^1\text{H}$  NMR (300 MHz,  $\text{CDCl}_3$ )  $\delta$  7.60 – 7.53 (m, 2H), 6.99 – 6.91 (m, 2H), 3.85 (s, 3H).  $^{13}\text{C}$  NMR (75 MHz,  $\text{CDCl}_3$ )  $\delta$  162.81, 133.83, 119.11, 114.71, 103.79, 55.47.

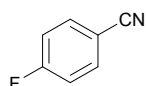

**4-fluorobenzonitrile (2d):**<sup>[2]</sup>

$^1\text{H}$  NMR (500 MHz,  $\text{CDCl}_3$ )  $\delta$  7.69 (ddd,  $J = 8.9, 4.9, 2.5$  Hz, 2H), 7.22 – 7.15 (m, 2H).  $^{13}\text{C}$  NMR (126 MHz,  $\text{CDCl}_3$ )  $\delta$  165.16 (d,  $J = 256.6$  Hz), 134.80 (d,  $J = 9.3$  Hz), 118.14, 116.98 (d,  $J = 22.7$  Hz), 108.70 (d,  $J = 3.6$  Hz).  $^{19}\text{F}$  NMR (471 MHz,  $\text{CDCl}_3$ )  $\delta$  -102.43.

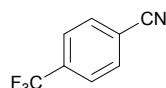

**4-(trifluoromethyl)benzonitrile (2e):**<sup>[2]</sup>

$^1\text{H}$  NMR (500 MHz,  $\text{CDCl}_3$ )  $\delta$  7.81 (d,  $J = 8.2$  Hz, 2H), 7.77 (d,  $J = 8.2$  Hz, 12H).  $^{13}\text{C}$  NMR (126 MHz,  $\text{CDCl}_3$ )  $\delta$  134.68 (q,  $J = 33.6$  Hz), 132.81 (s), 126.31 (q,  $J = 3.7$  Hz), 123.17 (q,  $J = 273.4$  Hz), 117.55 (s), 116.20 (s).  $^{19}\text{F}$  NMR (471 MHz,  $\text{CDCl}_3$ )  $\delta$  -63.54.

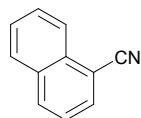

**1-naphthonitrile (2f):**<sup>[2]</sup>

$^1\text{H}$  NMR (500 MHz,  $\text{CDCl}_3$ )  $\delta$  8.18 (d,  $J = 8.2$  Hz, 1H), 8.01 (d,  $J = 8.3$  Hz, 1H), 7.90 – 7.82 (m, 2H), 7.63 (ddd,  $J = 8.3, 7.0, 1.2$  Hz, 1H), 7.60 – 7.54 (m, 1H), 7.45 (dd,  $J = 8.3, 7.2$  Hz, 1H).  $^{13}\text{C}$  NMR (125 MHz,  $\text{CDCl}_3$ )  $\delta$  133.24, 132.89, 132.55, 132.29, 128.65, 128.55, 127.51, 125.04, 124.89, 117.78, 110.13.

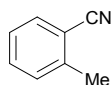

**2-methylbenzonitrile (2h):**<sup>[2]</sup>

$^1\text{H}$  NMR (500 MHz,  $\text{CDCl}_3$ )  $\delta$  7.59 (d,  $J = 7.7$  Hz, 1H), 7.48 (t,  $J = 7.7$  Hz, 1H), 7.31 (d,  $J = 7.7$  Hz, 1H), 7.27 (t,  $J = 7.6$  Hz, 1H), 2.55 (s, 3H).  $^{13}\text{C}$  NMR (126 MHz,  $\text{CDCl}_3$ )  $\delta$  141.89, 132.66, 132.47, 130.24, 126.24, 118.12, 112.75, 20.44.

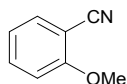

**2-methoxybenzonitrile (2i):**<sup>[3]</sup>

$^1\text{H}$  NMR (500 MHz,  $\text{CDCl}_3$ )  $\delta$  7.61 – 7.51 (m, 2H), 7.06 – 6.97 (m, 2H), 3.94 (s, 3H).  $^{13}\text{C}$  NMR (126 MHz,  $\text{CDCl}_3$ )  $\delta$  161.36, 134.49, 133.86, 120.87, 116.59, 111.42, 101.95, 56.11.

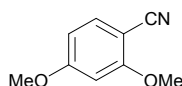

**2,4-dimethoxybenzonitrile (2j):**<sup>[4]</sup>

<sup>1</sup>H NMR (500 MHz, CDCl<sub>3</sub>) δ 7.48 (d, *J* = 8.5 Hz, 1H), 6.51 (d, *J* = 8.6 Hz, 1H), 6.46 (s, 1H), 3.90 (s, 3H), 3.86 (s, 3H). <sup>13</sup>C NMR (126 MHz, CDCl<sub>3</sub>) δ 164.77, 163.00, 135.08, 117.06, 105.87, 98.66, 94.23, 56.11, 55.84.

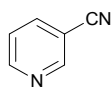**nicotinonitrile (2k):**<sup>[5]</sup>

<sup>1</sup>H NMR (300 MHz, CDCl<sub>3</sub>) δ 8.96 – 8.89 (m, 1H), 8.85 (dd, *J* = 5.0, 1.6 Hz, 1H), 8.01 (dt, *J* = 8.0, 1.9 Hz, 1H), 7.48 (ddd, *J* = 7.9, 5.0, 0.8 Hz, 1H). <sup>13</sup>C NMR (75 MHz, CDCl<sub>3</sub>) δ 152.94, 152.39, 139.21, 123.60, 116.45, 110.05.

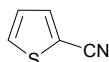**thiophene-2-carbonitrile (2l):**<sup>[2]</sup>

<sup>1</sup>H NMR (500 MHz, CDCl<sub>3</sub>) δ 7.64 (d, *J* = 3.7 Hz, 1H), 7.62 (d, *J* = 5.1 Hz, 1H), 7.14 (t, *J* = 4.4 Hz, 1H). <sup>13</sup>C NMR (126 MHz, CDCl<sub>3</sub>) δ 137.51, 132.68, 127.75, 114.33, 110.02.

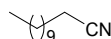**dodecanenitrile (2m):**<sup>[6]</sup>

<sup>1</sup>H NMR (500 MHz, CDCl<sub>3</sub>) δ 2.33 (t, *J* = 7.2 Hz, 2H), 1.69 – 1.61 (m, 2H), 1.48 – 1.40 (m, 2H), 1.33 – 1.24 (m, 14H), 0.88 (t, *J* = 6.9 Hz, 3H). <sup>13</sup>C NMR (126 MHz, CDCl<sub>3</sub>) δ 119.99, 32.03, 29.85, 29.69, 29.65, 29.44, 28.91, 28.82, 25.54, 22.82, 17.28, 14.24.

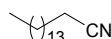**palmitonitrile (2n):**<sup>[7]</sup>

<sup>1</sup>H NMR (500 MHz, CDCl<sub>3</sub>) δ 2.33 (t, *J* = 7.1 Hz, 2H), 1.69 – 1.61 (m, 2H), 1.48 – 1.40 (m, 2H), 1.29 – 1.26 (m, 22H), 0.88 (t, *J* = 6.8 Hz, 3H). <sup>13</sup>C NMR (126 MHz, CDCl<sub>3</sub>) δ 119.95, 32.05, 29.81, 29.79, 29.77, 29.76, 29.71, 29.62, 29.48, 29.43, 28.89, 28.79, 25.51, 22.81, 17.24, 14.23.

**Reference**

- 1 M. Bindl, R. Stade, E. K. Heilmann, A. Picot, R. Goddard, A. Fürstner, *J. Am. Chem. Soc.*, 2009, **131**, 9468.
- 2 S. Enthaler, *Eur. J. Org. Chem.* 2011, 4760.
- 3 H. Yu, R. N. Richey, W. D. Miller, J. Xu, S. A. May, *J. Org. Chem.* 2011, **76**, 665.
- 4 G. Zhang, X. Ren, J. Chen, M. Hu, J. Cheng, *Org. Lett.*, 2011, **13**, 5004.
- 5 P. Anbarasan, H. Neumann, M. Beller, *Chem. Eur. J.*, 2010, **16**, 4725.
- 6 J. Kim, S. S. Stahl, *ACS Catal.* 2013, **3**, 1652.
- 7 D. Crich, H. Xu, F. Kenig, *J. Org. Chem.* 2006, **71**, 5016.

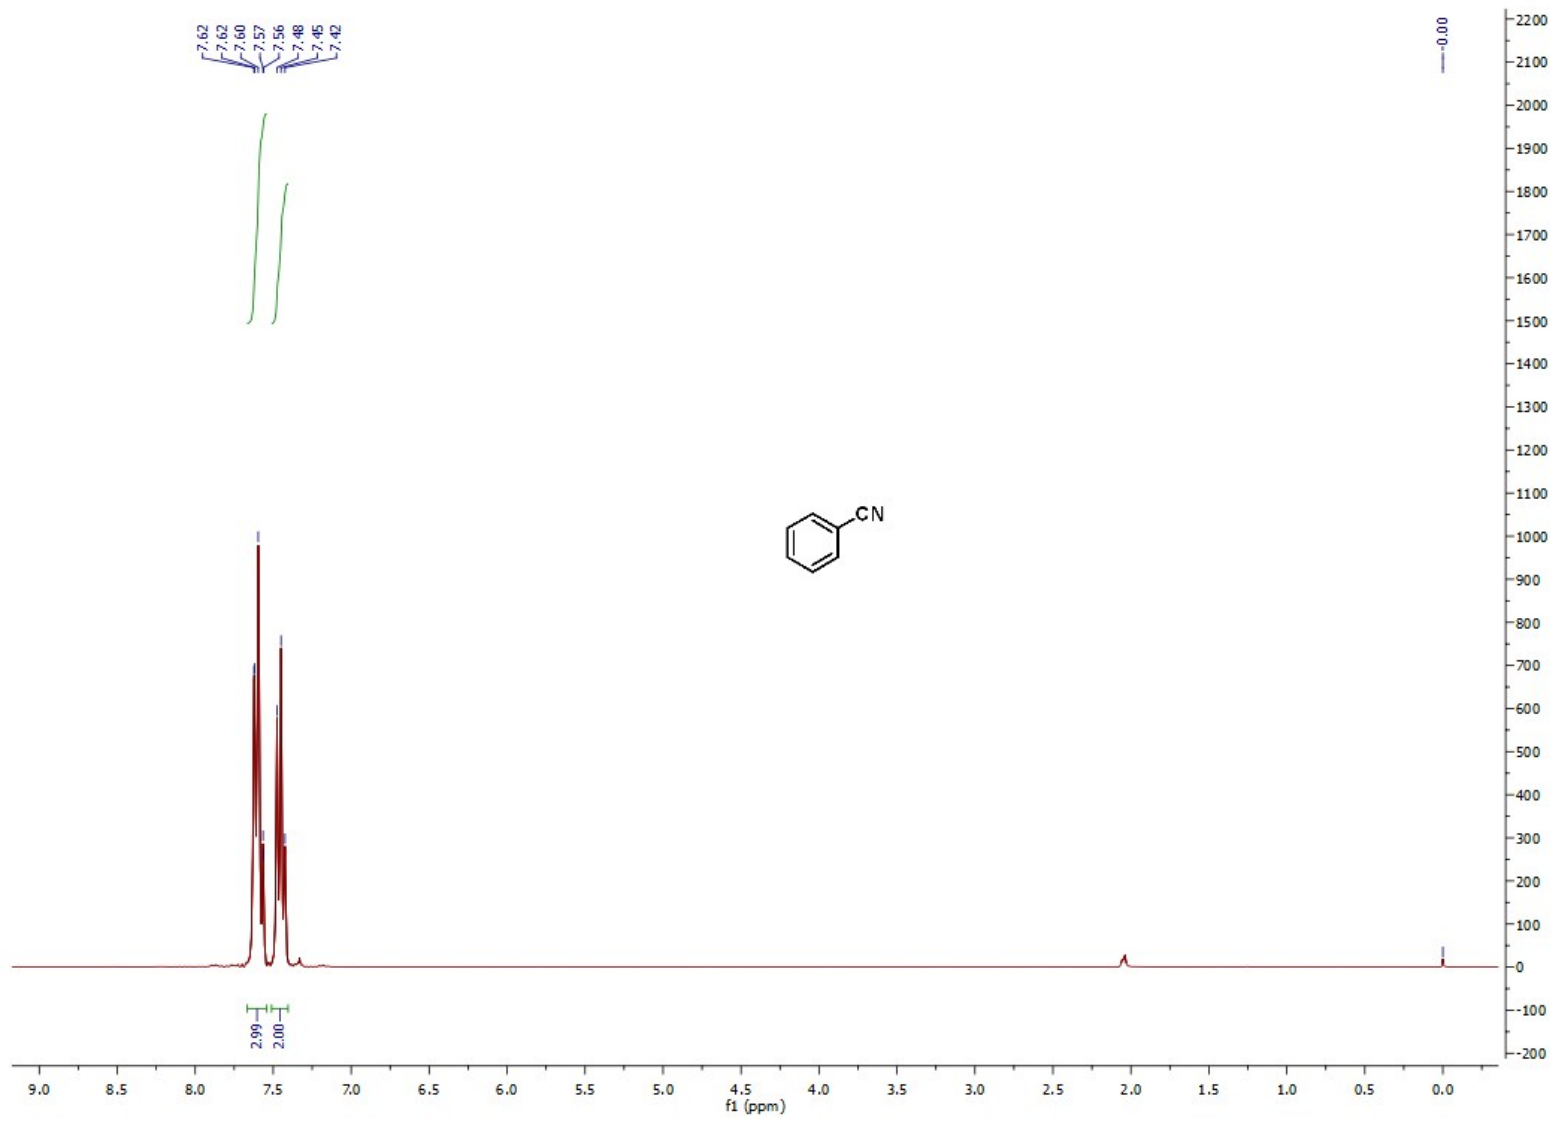

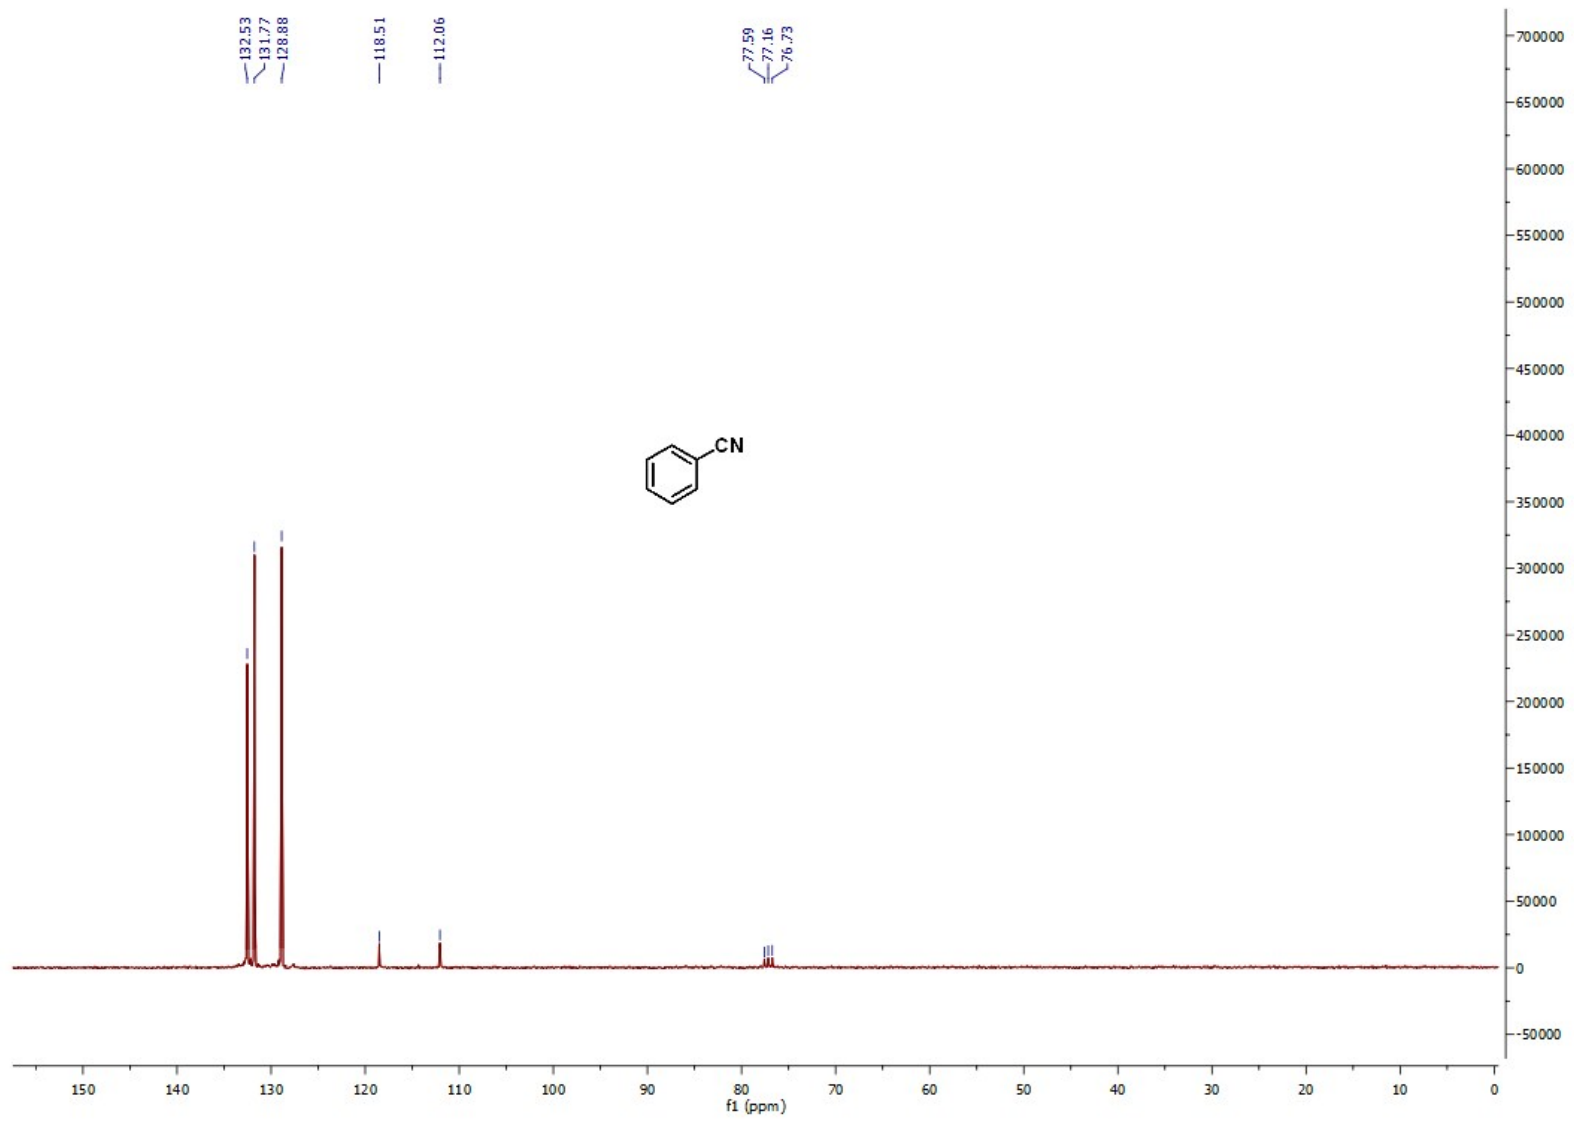

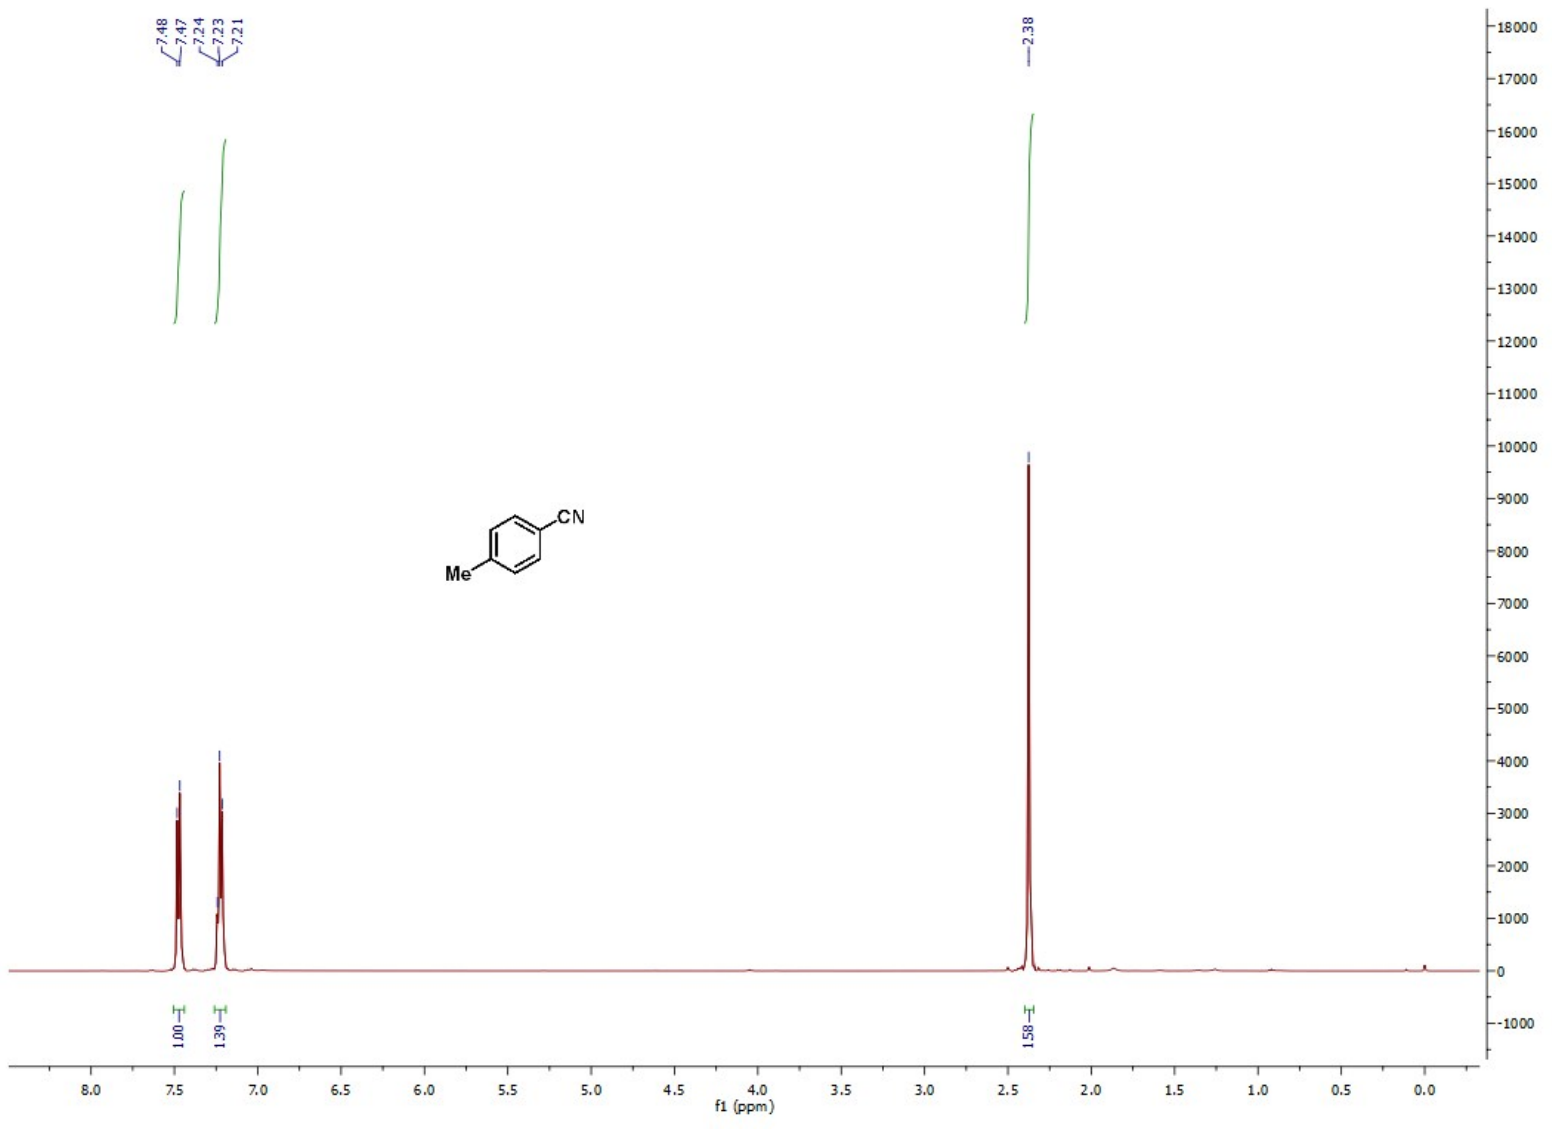

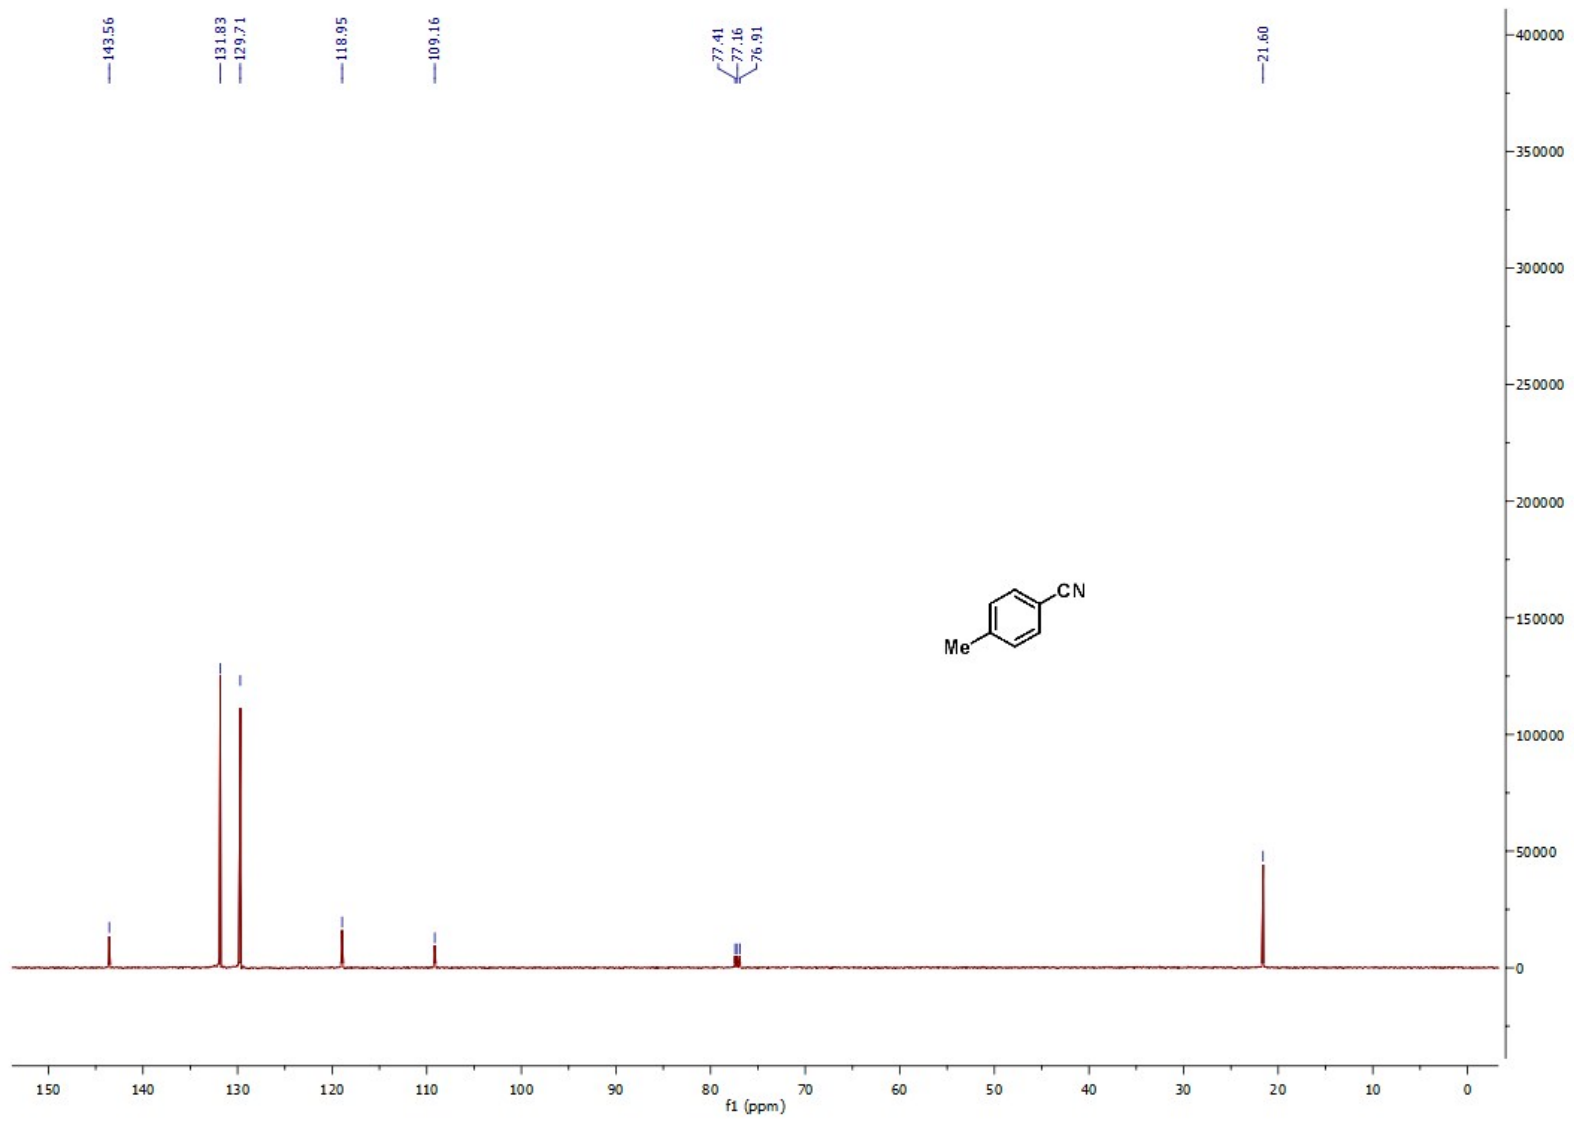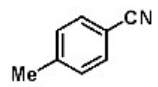

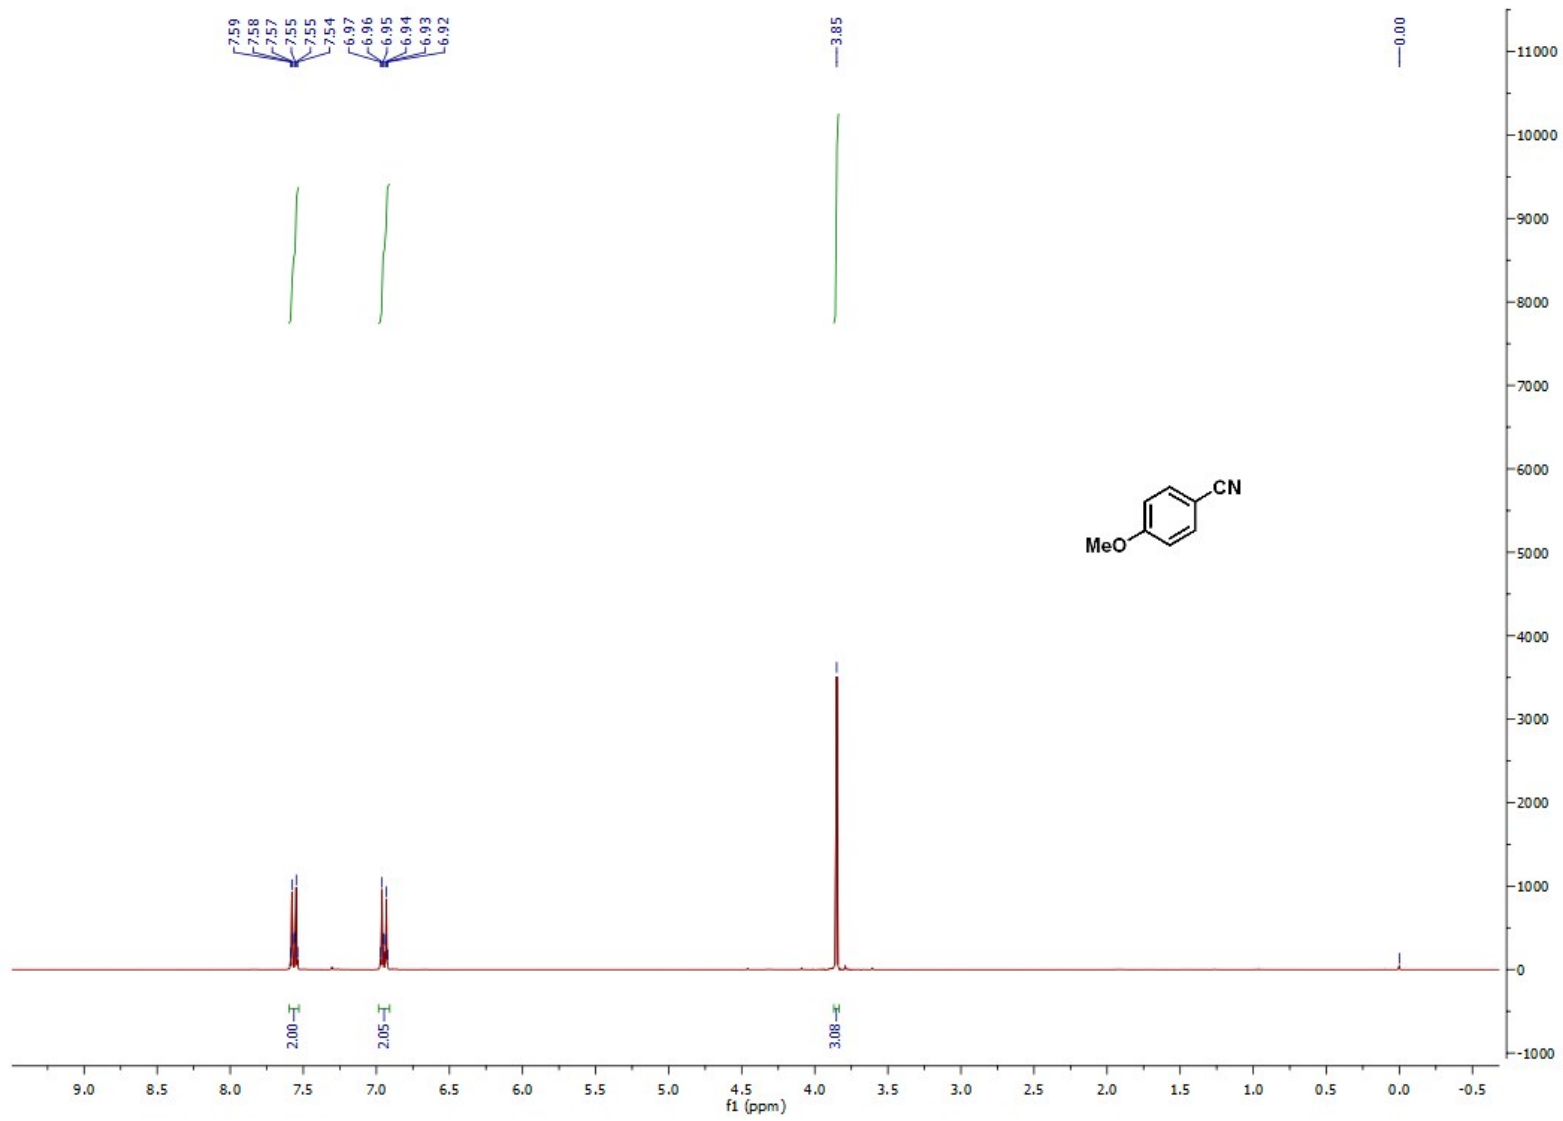



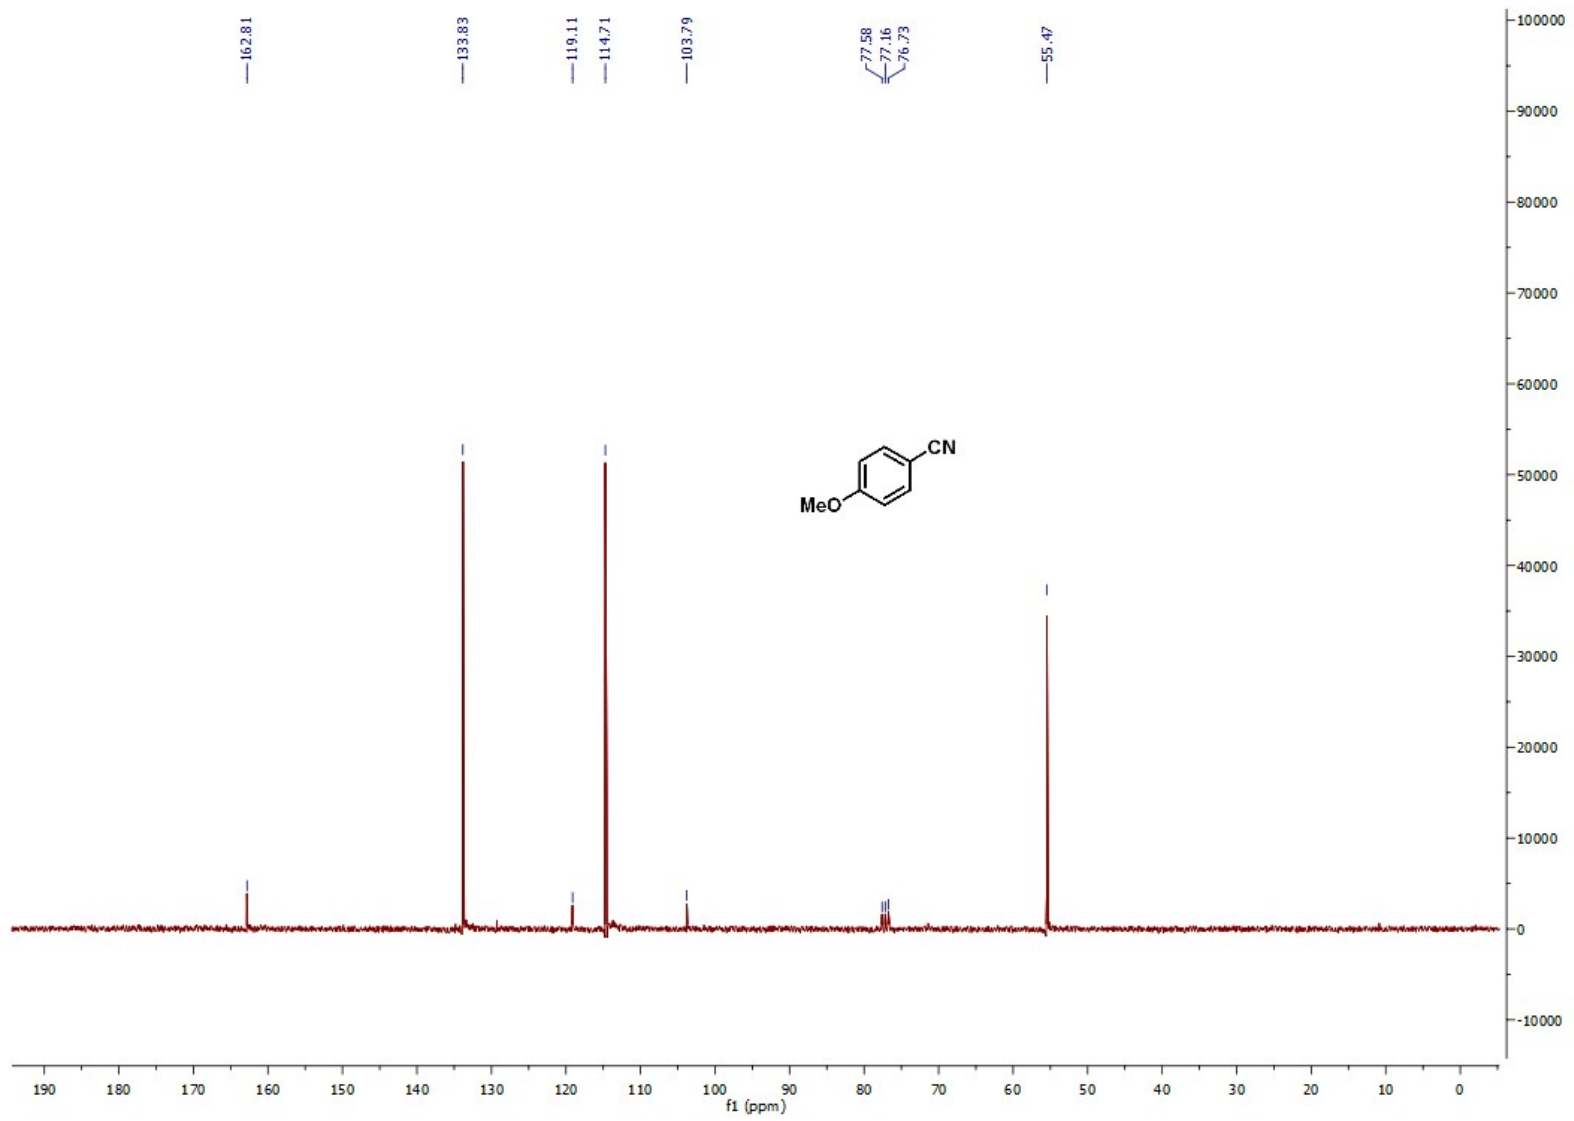

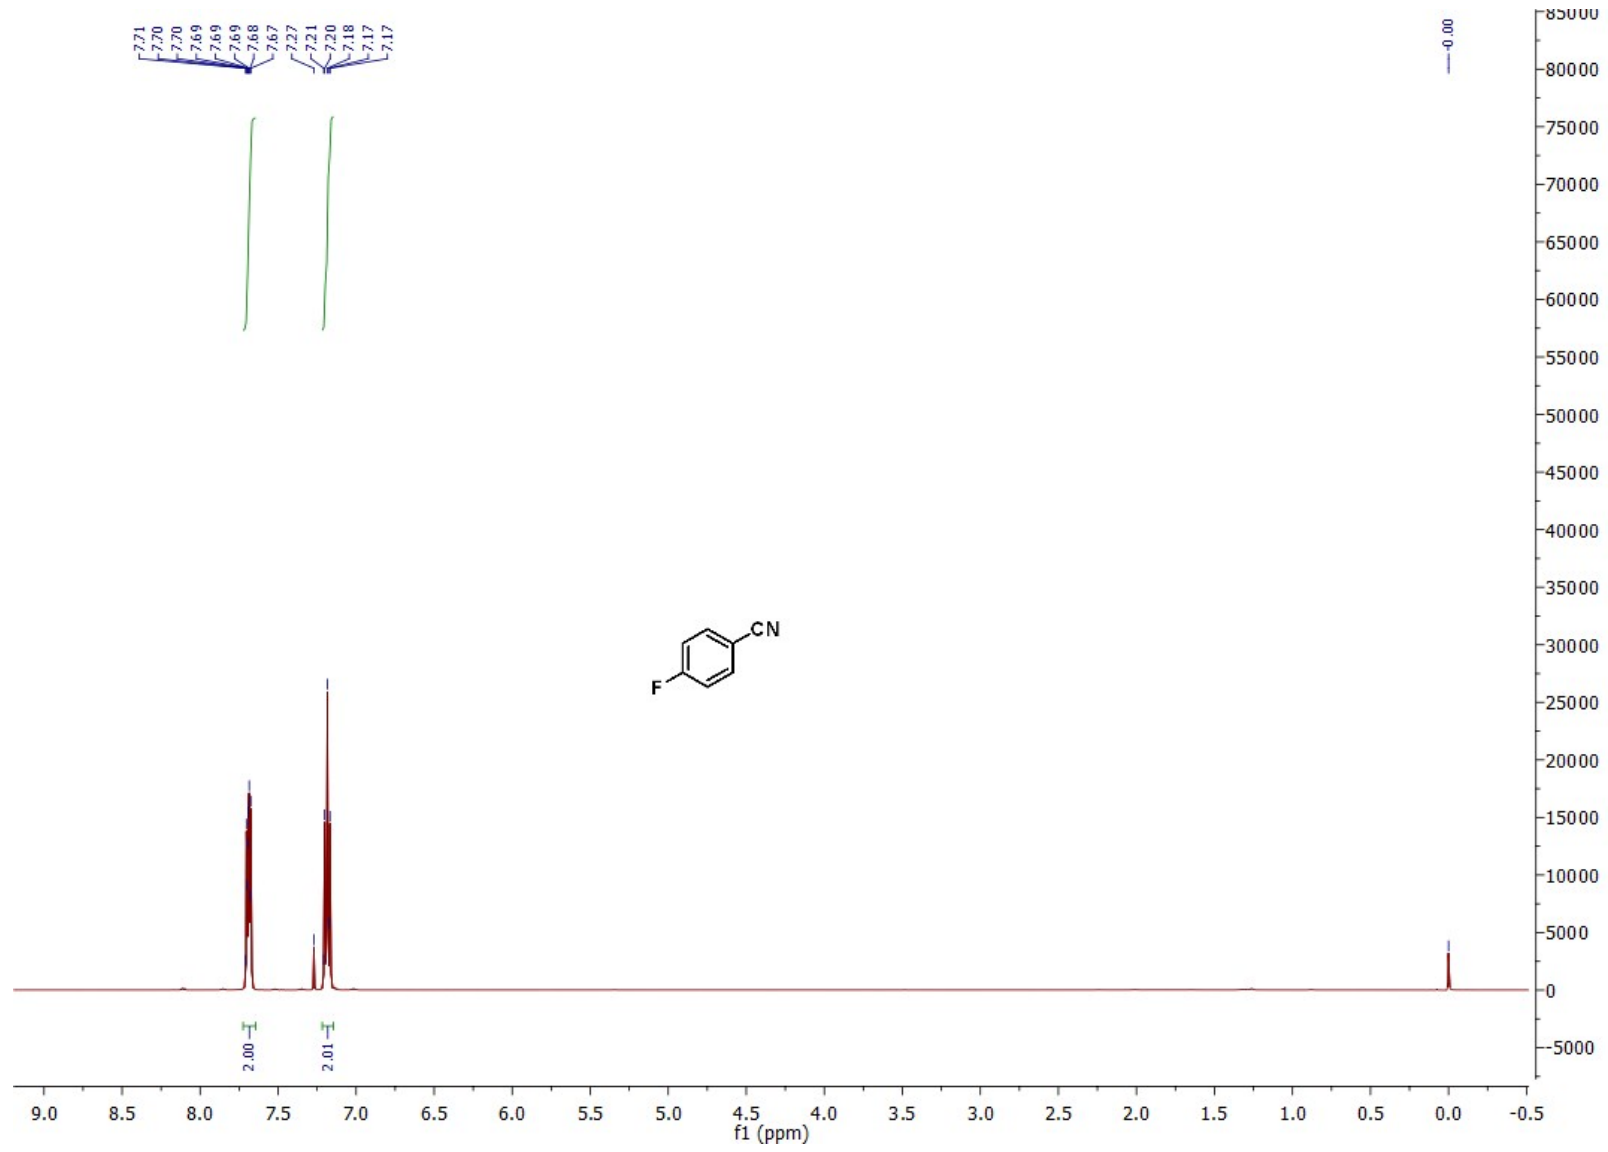

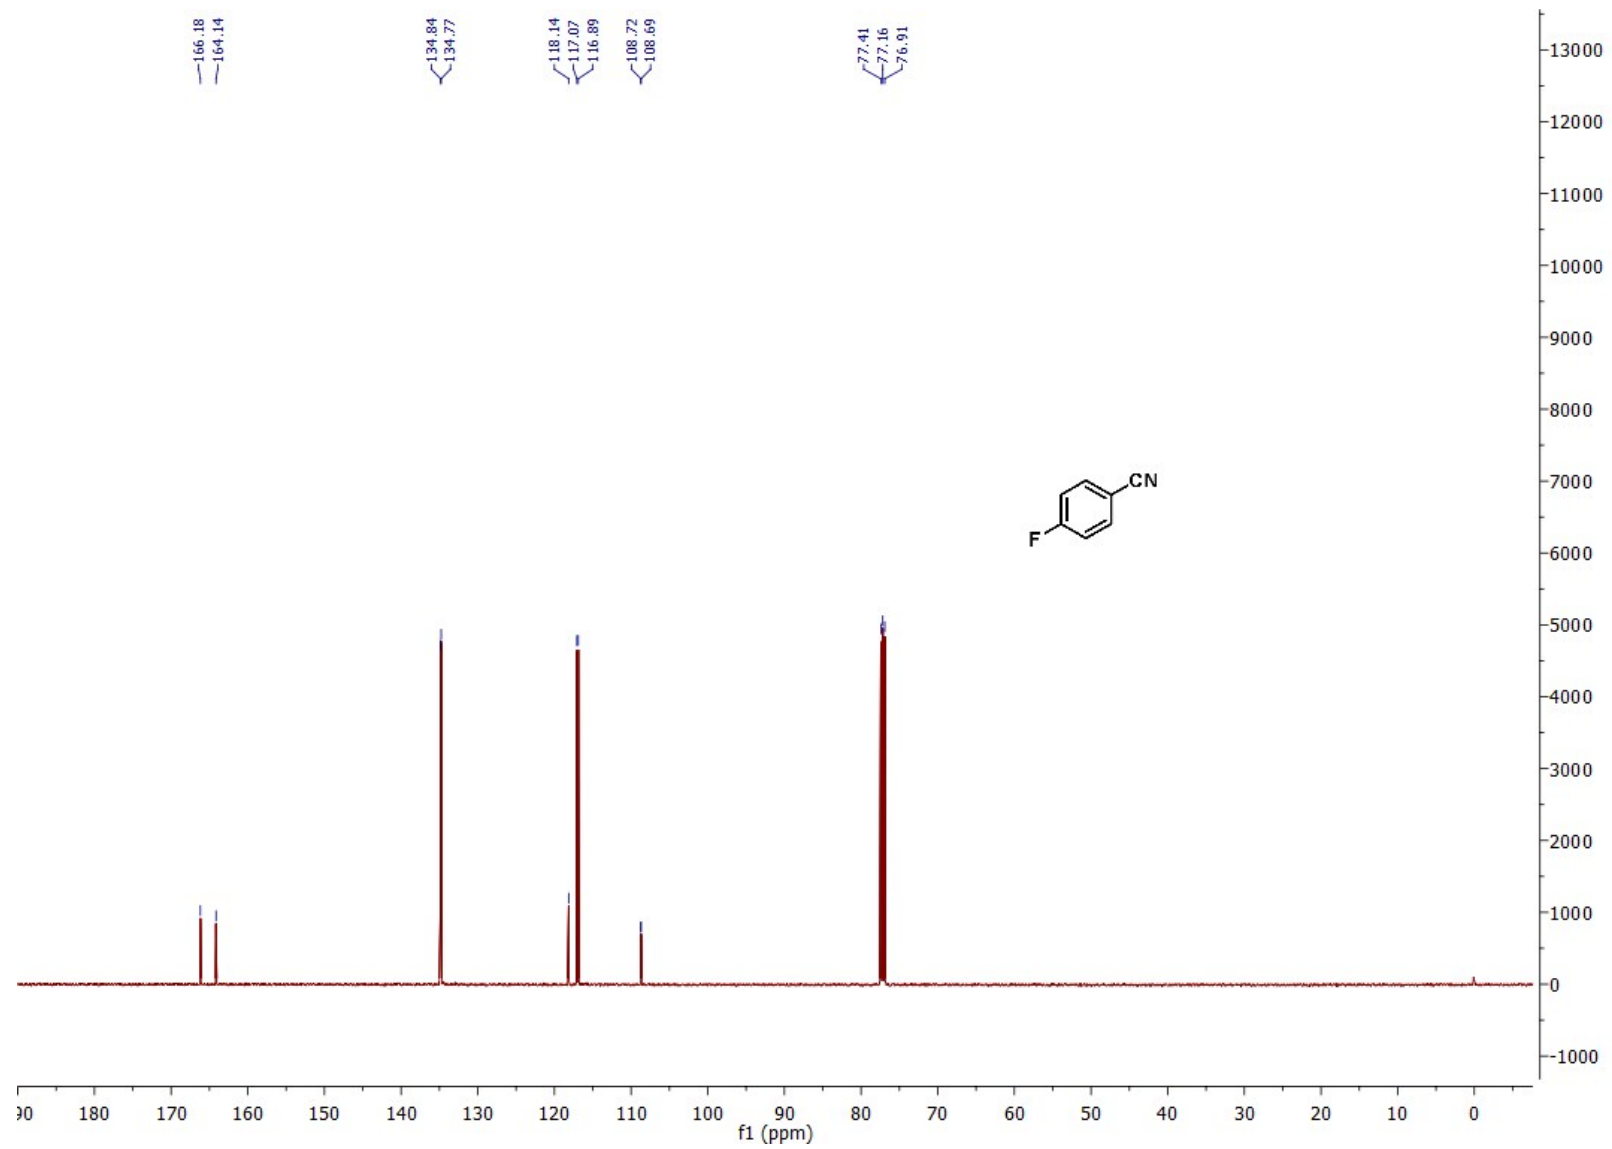

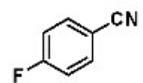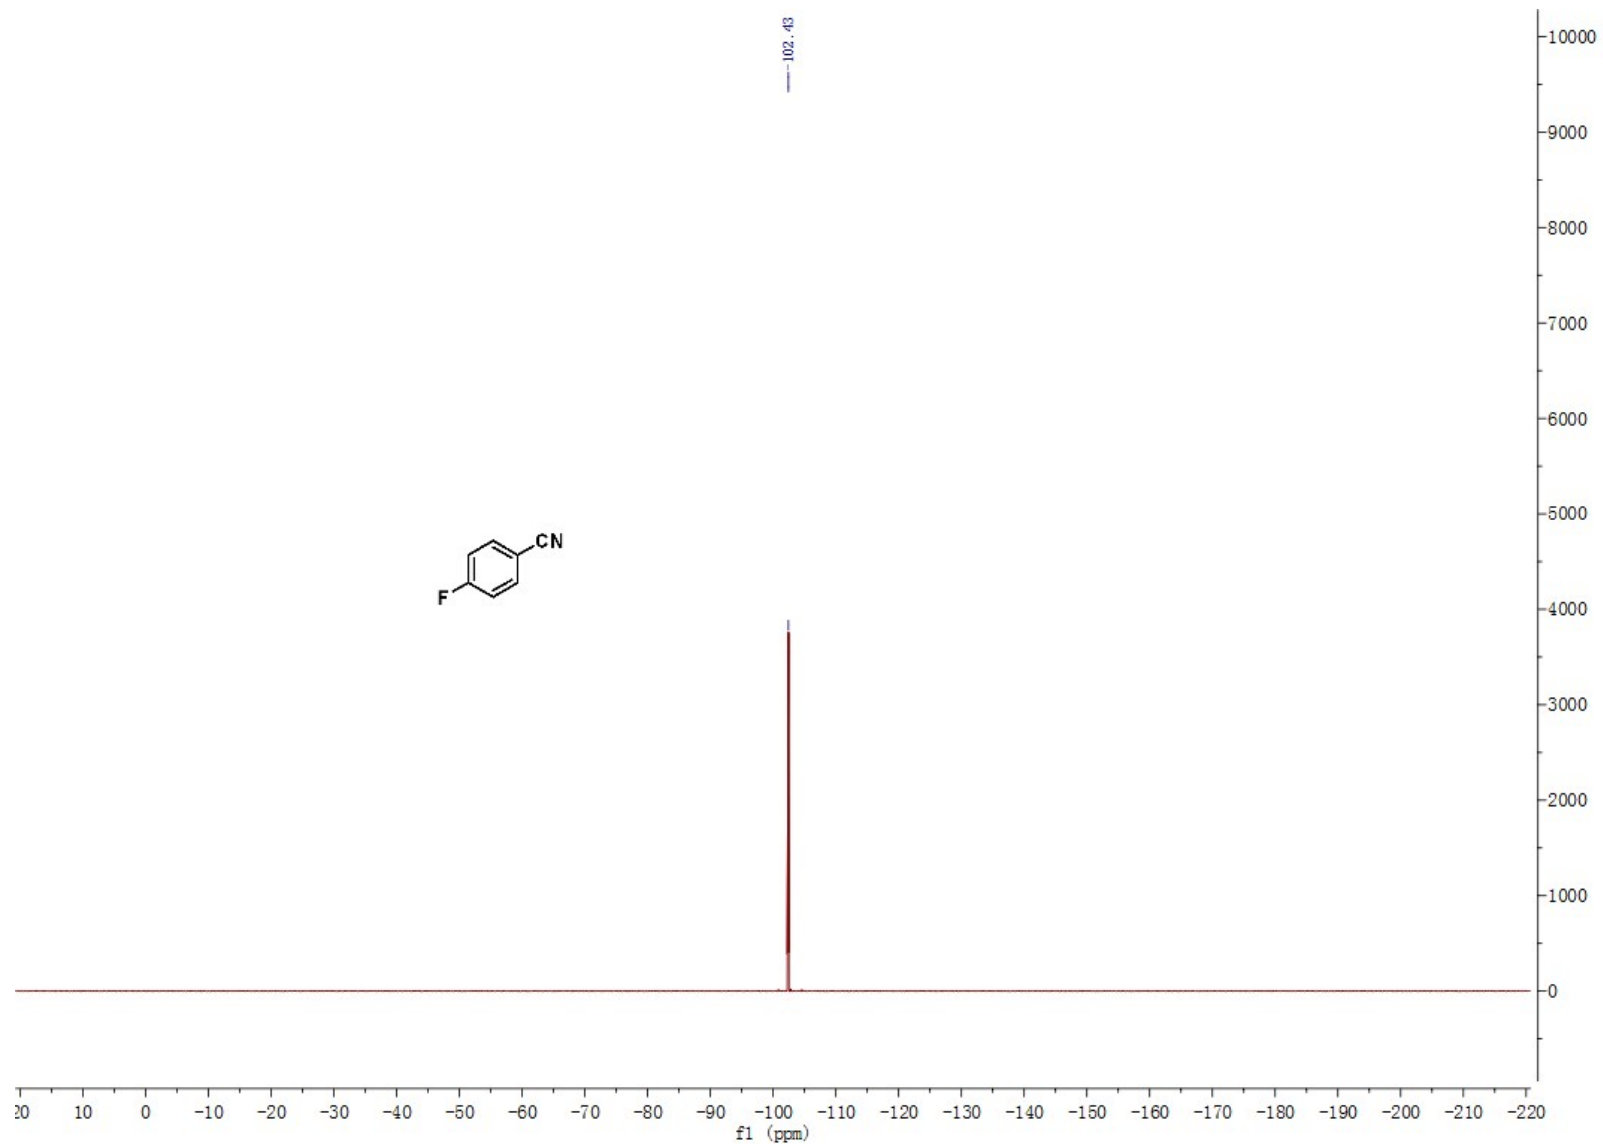

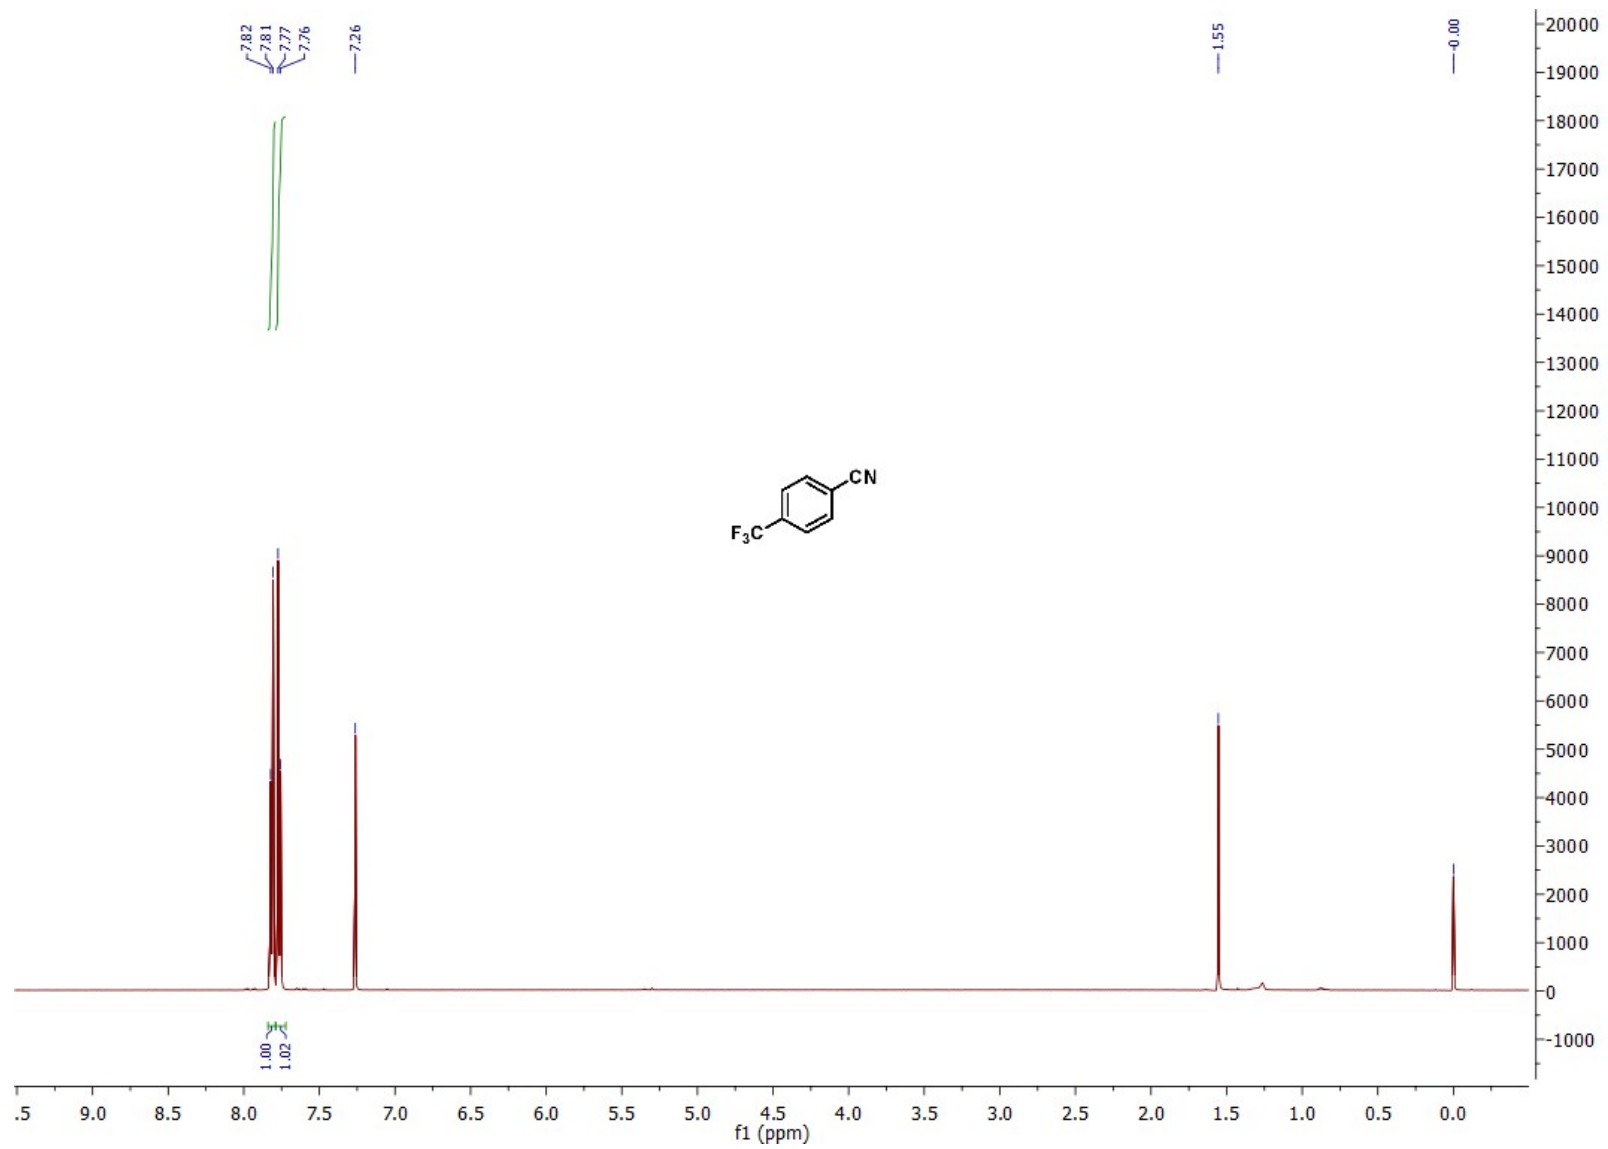

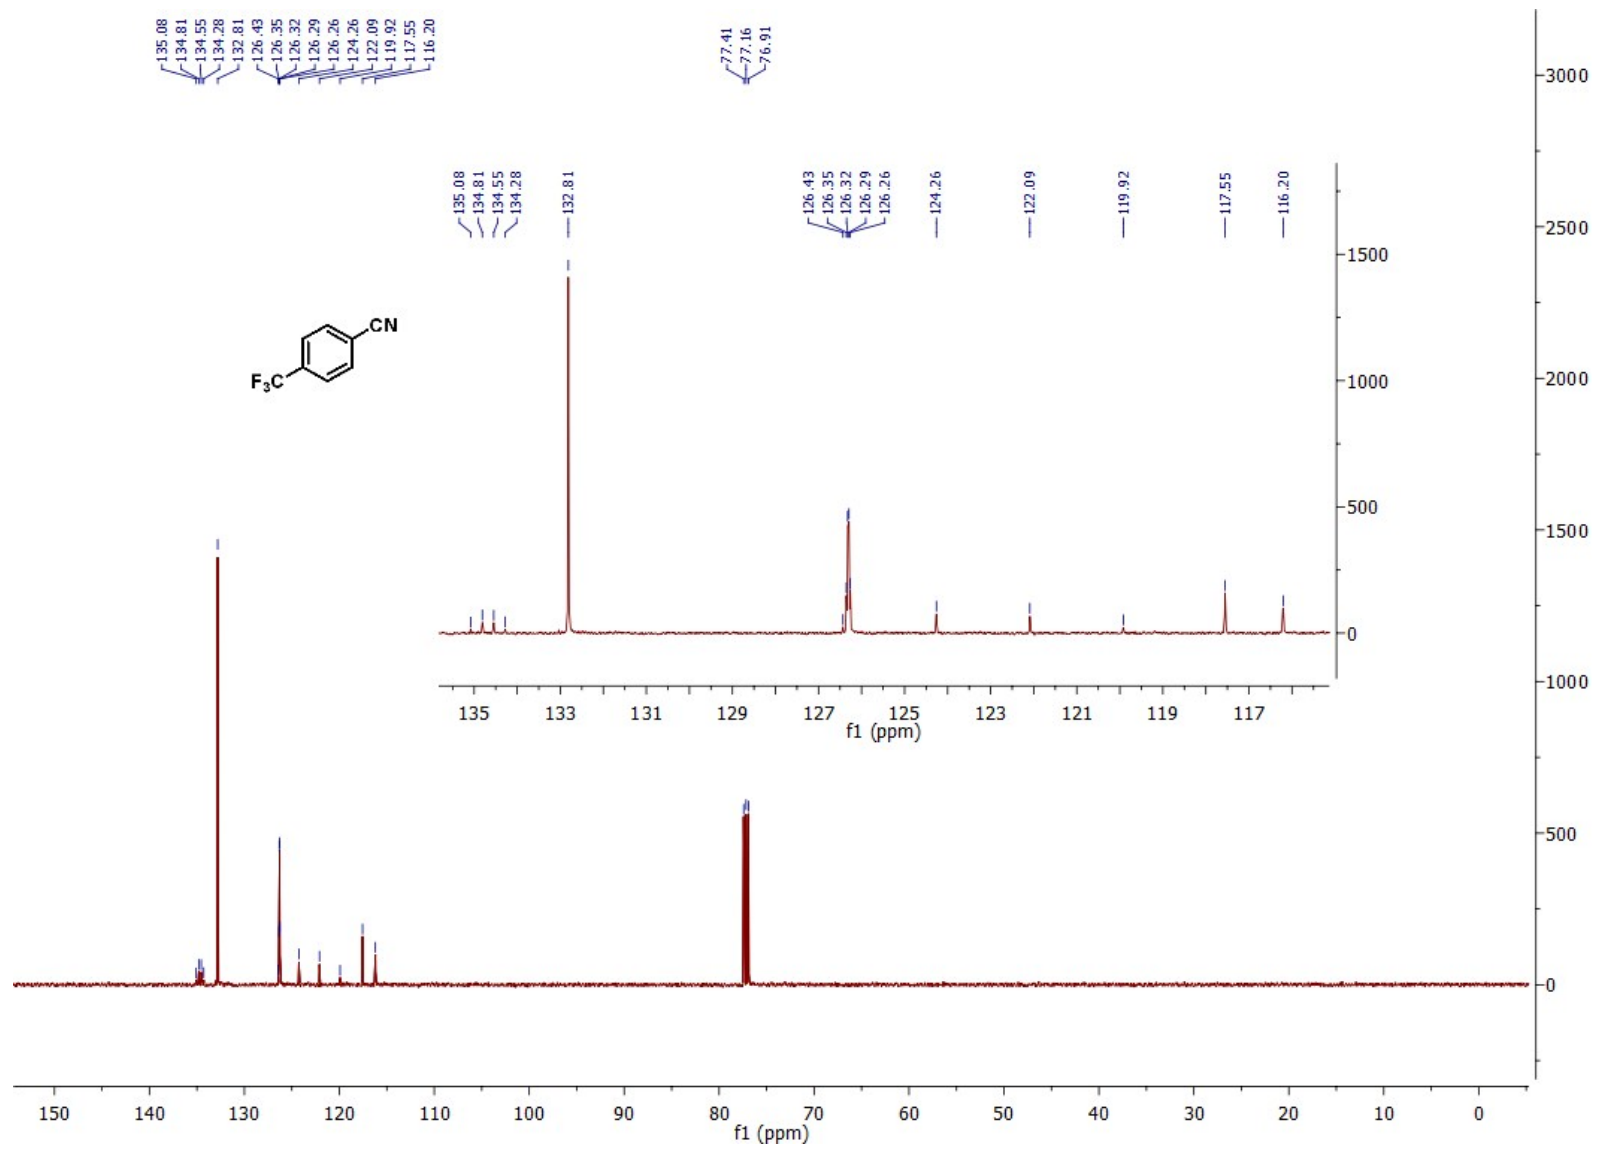

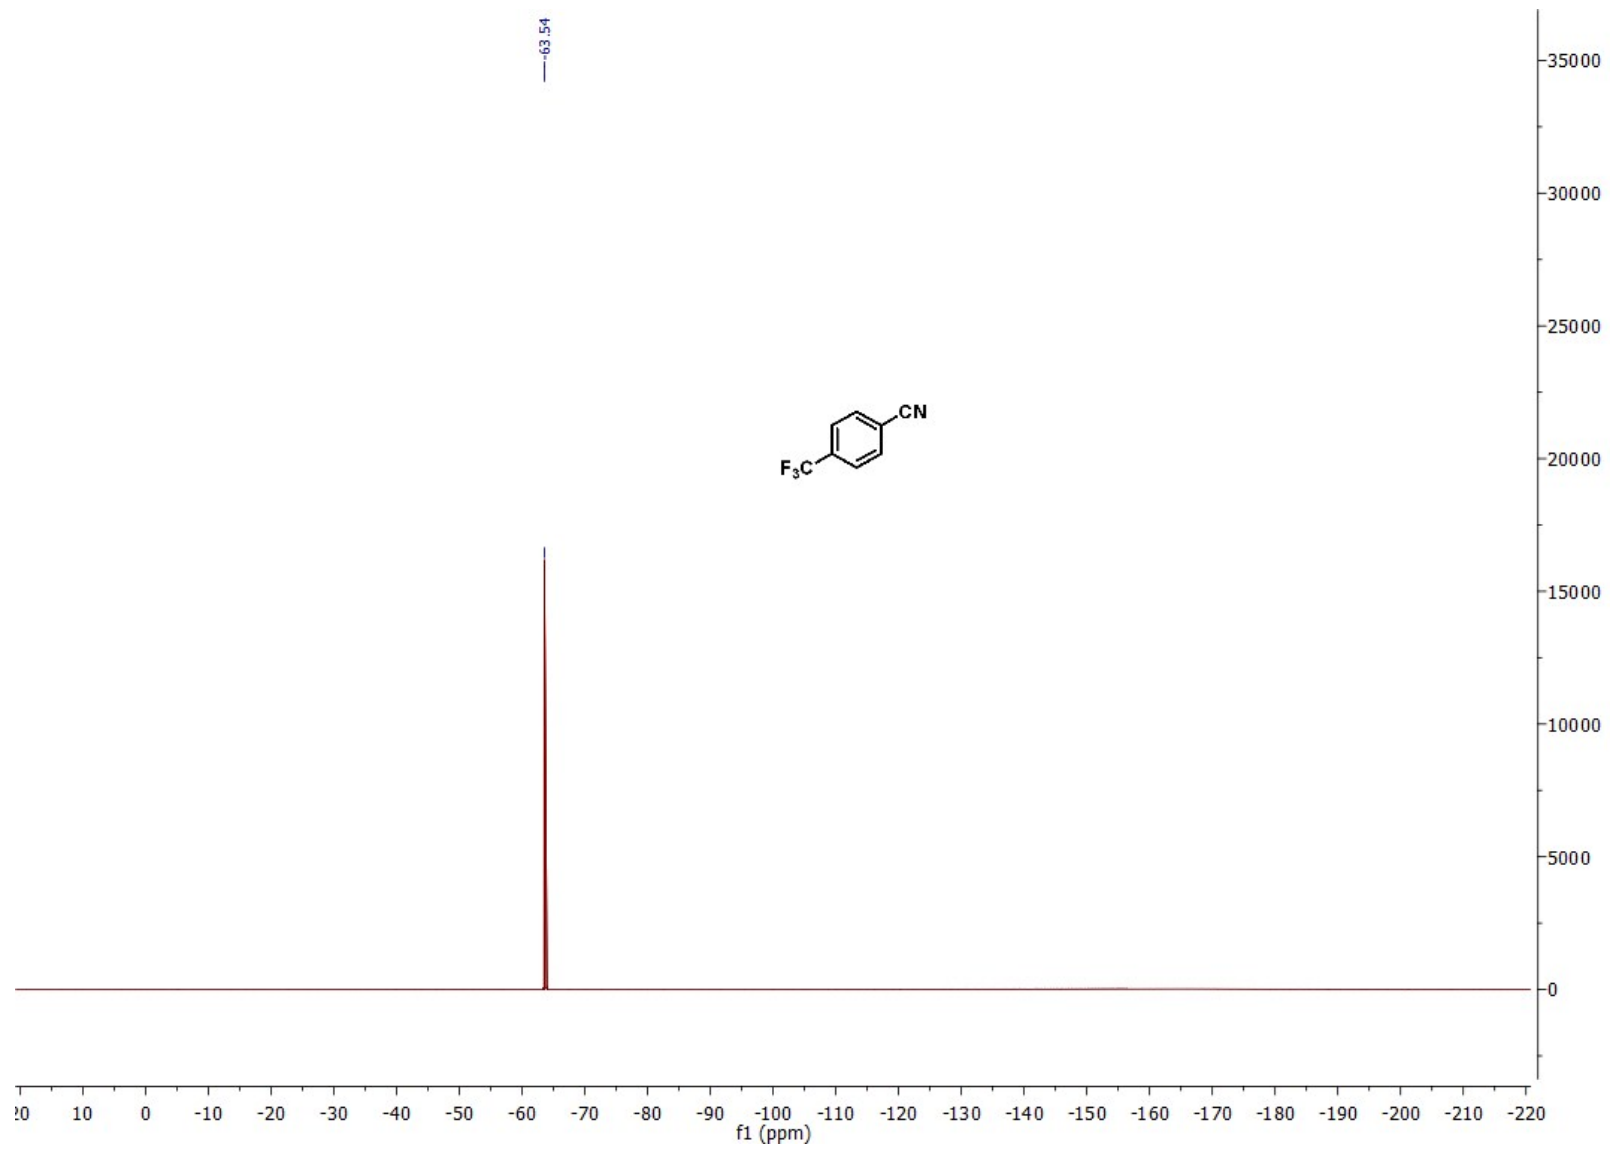

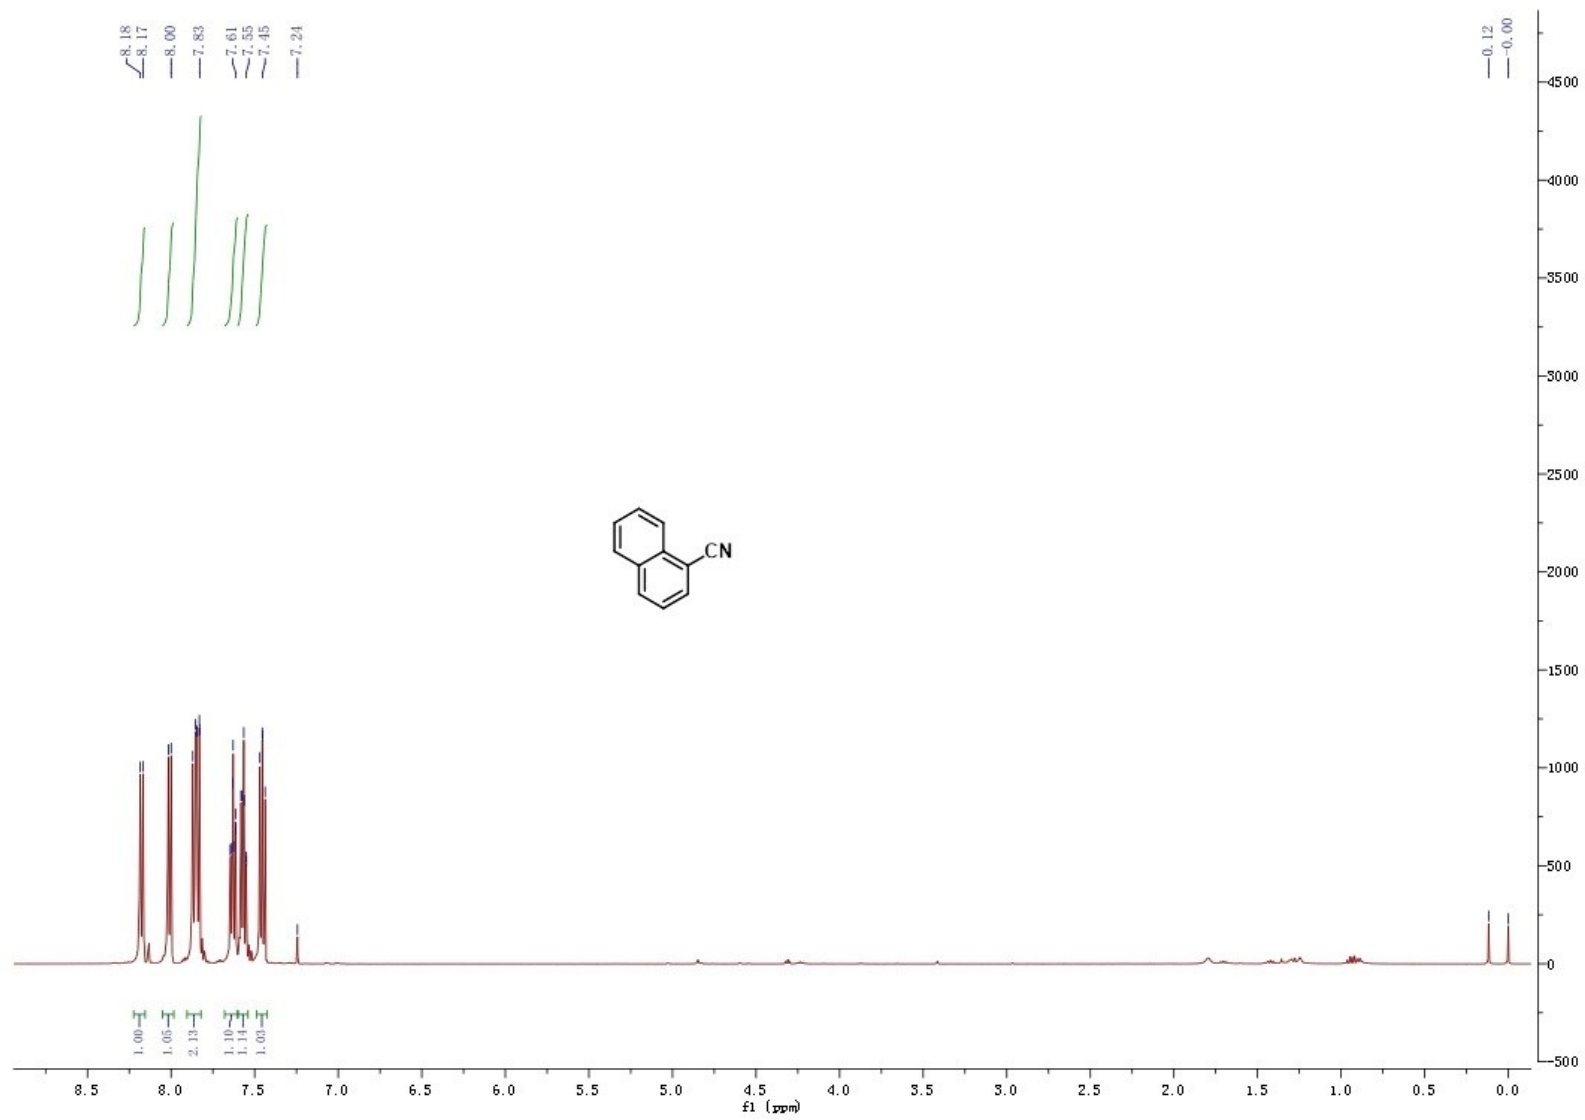



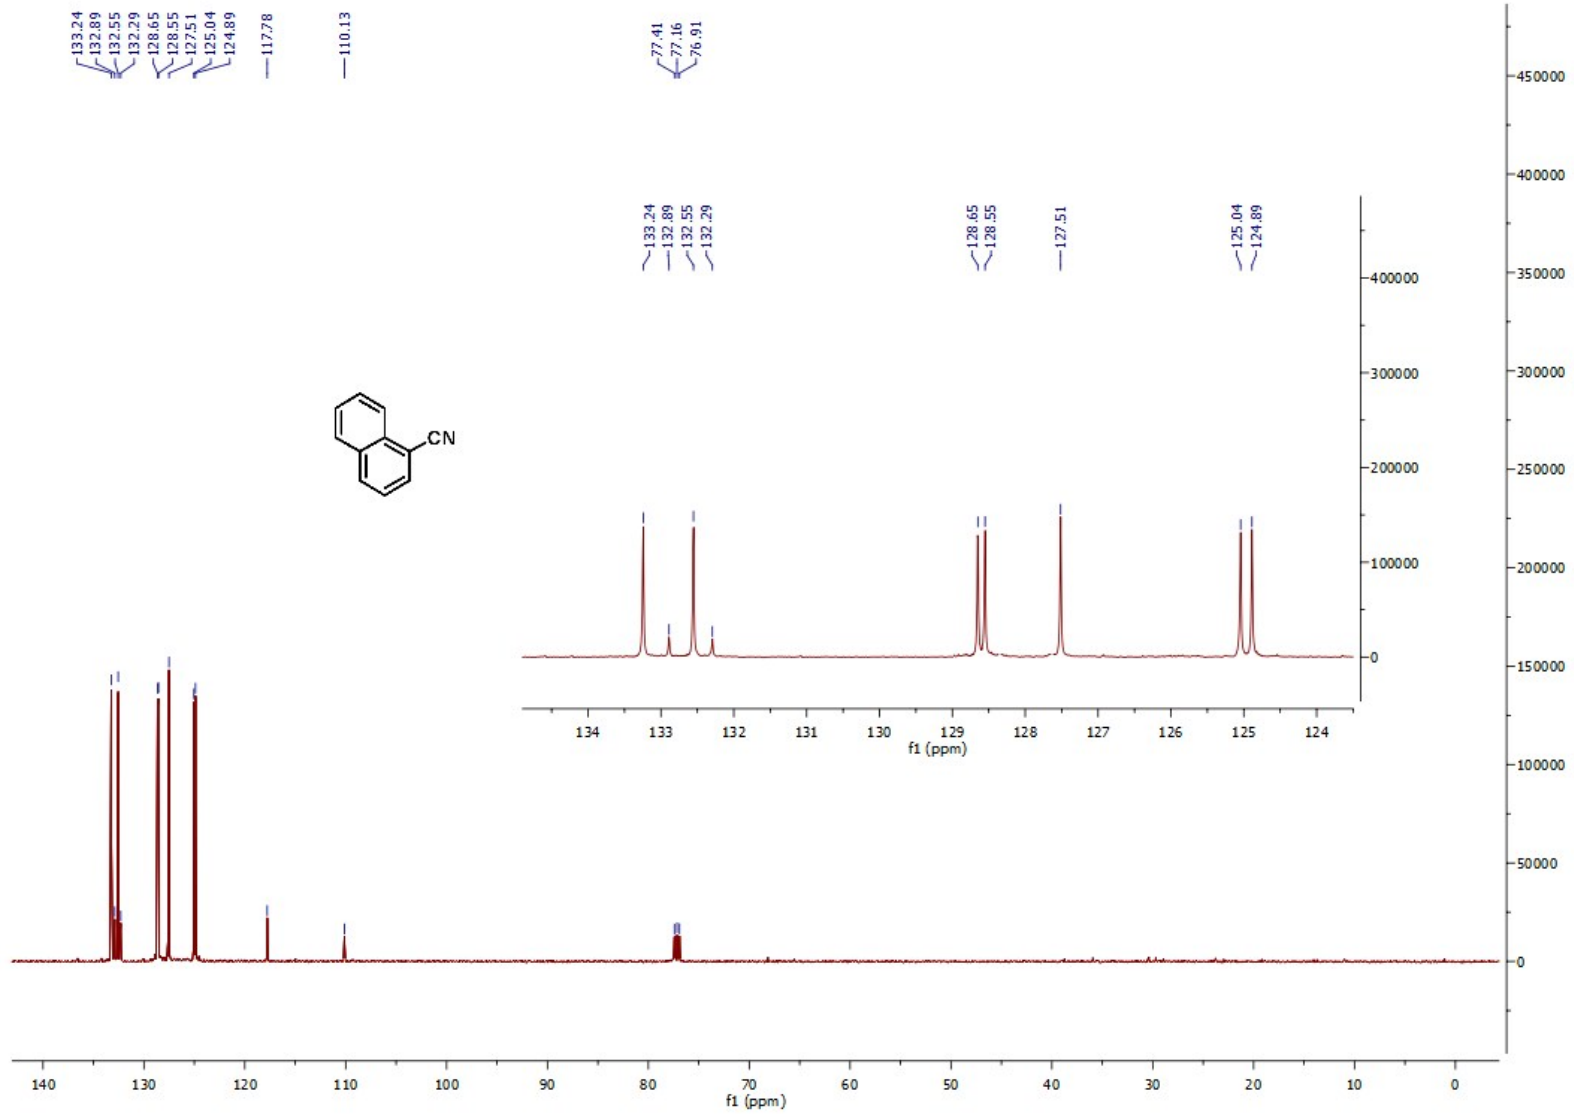

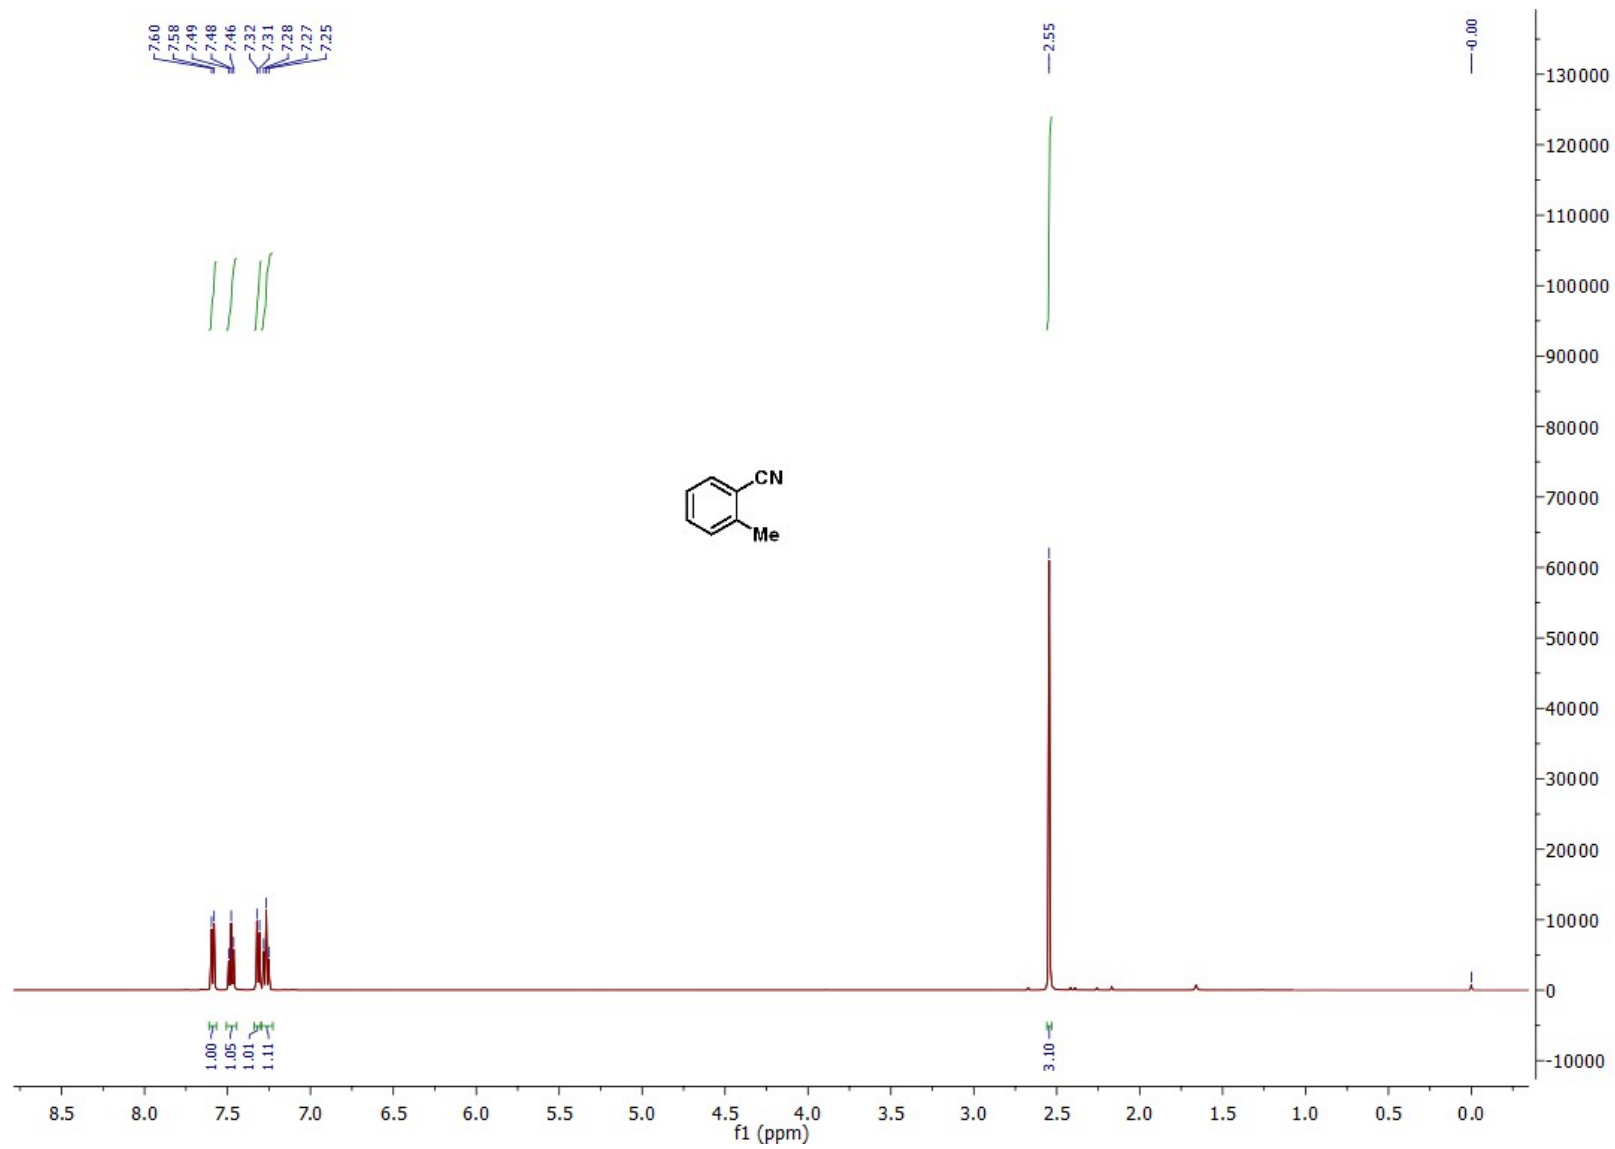

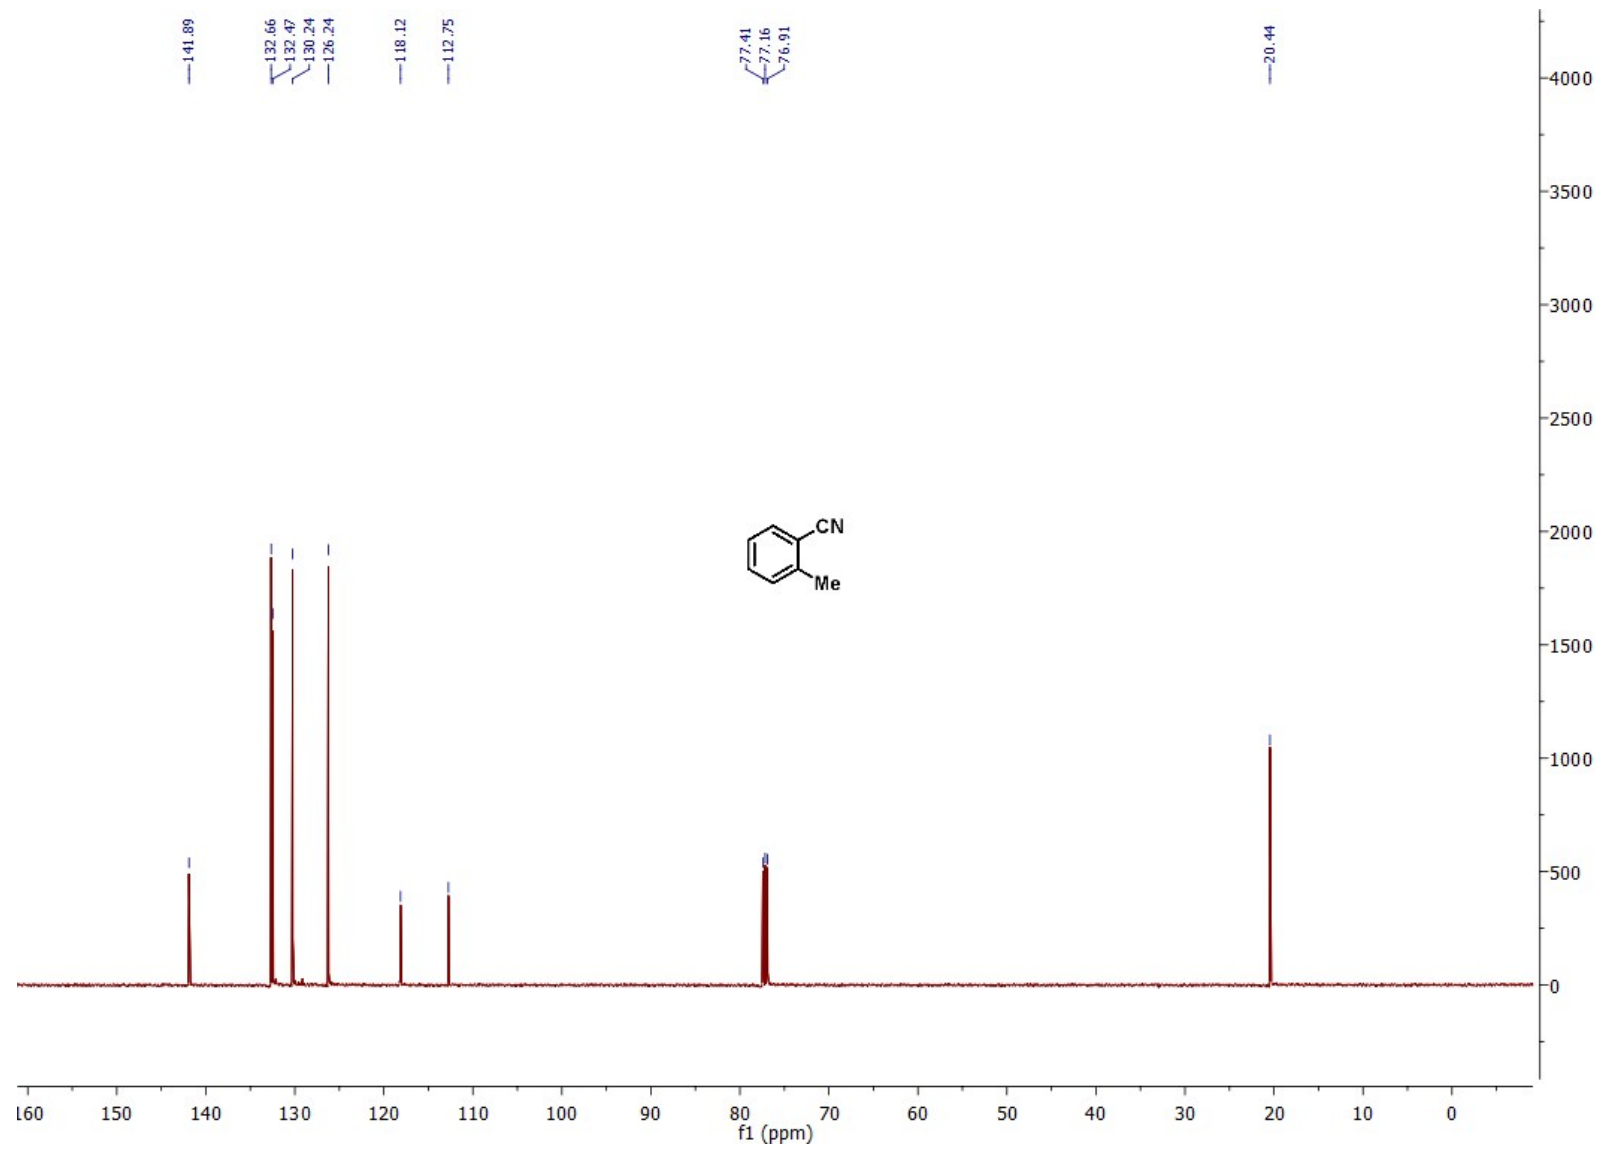

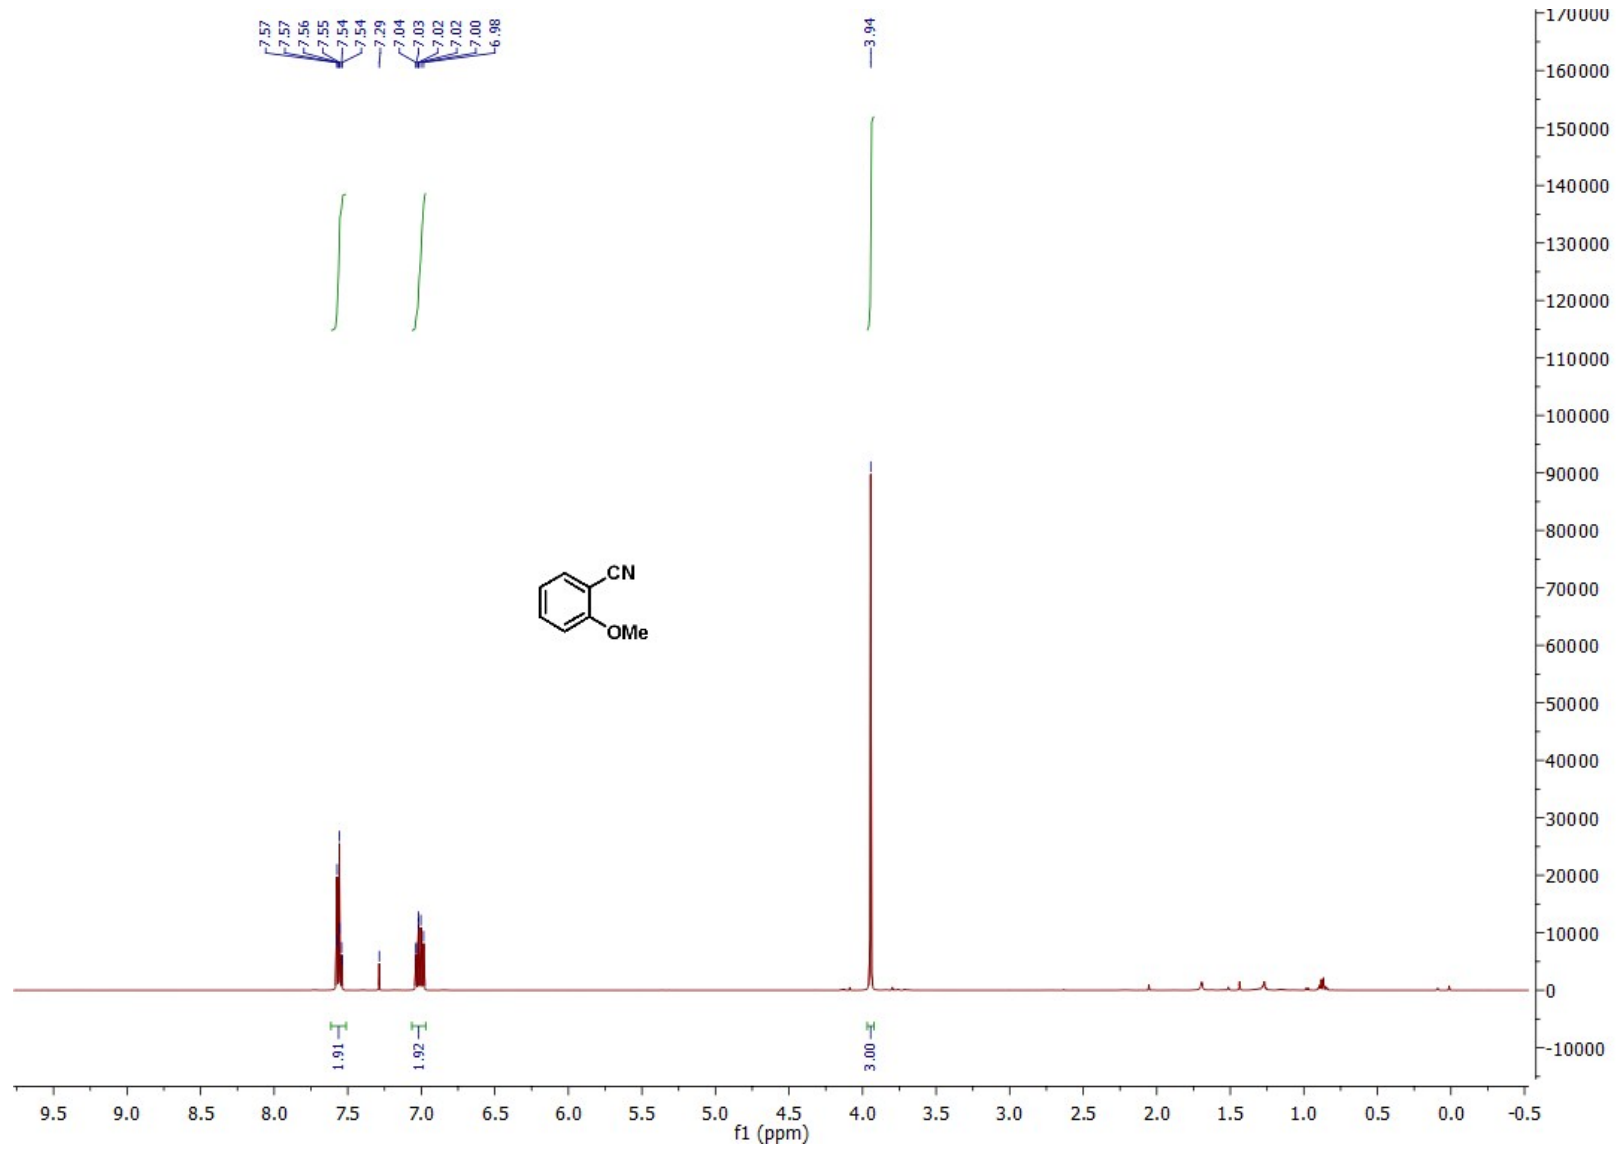

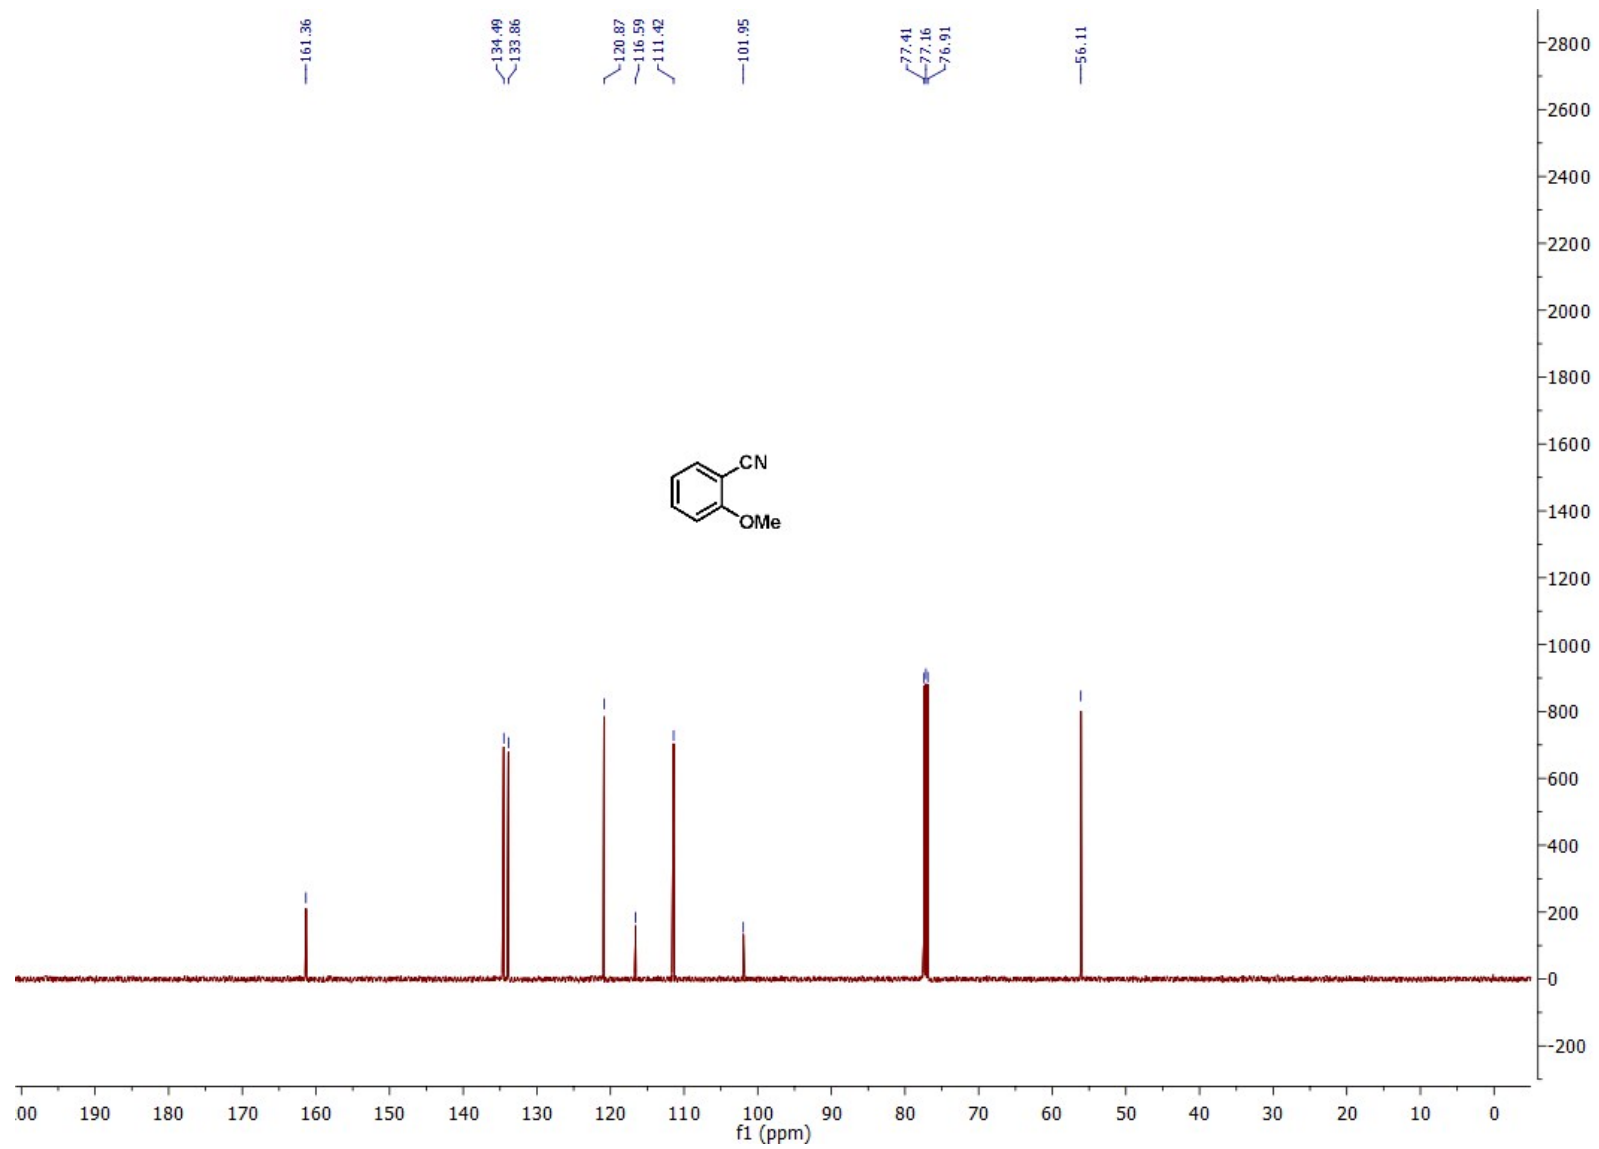

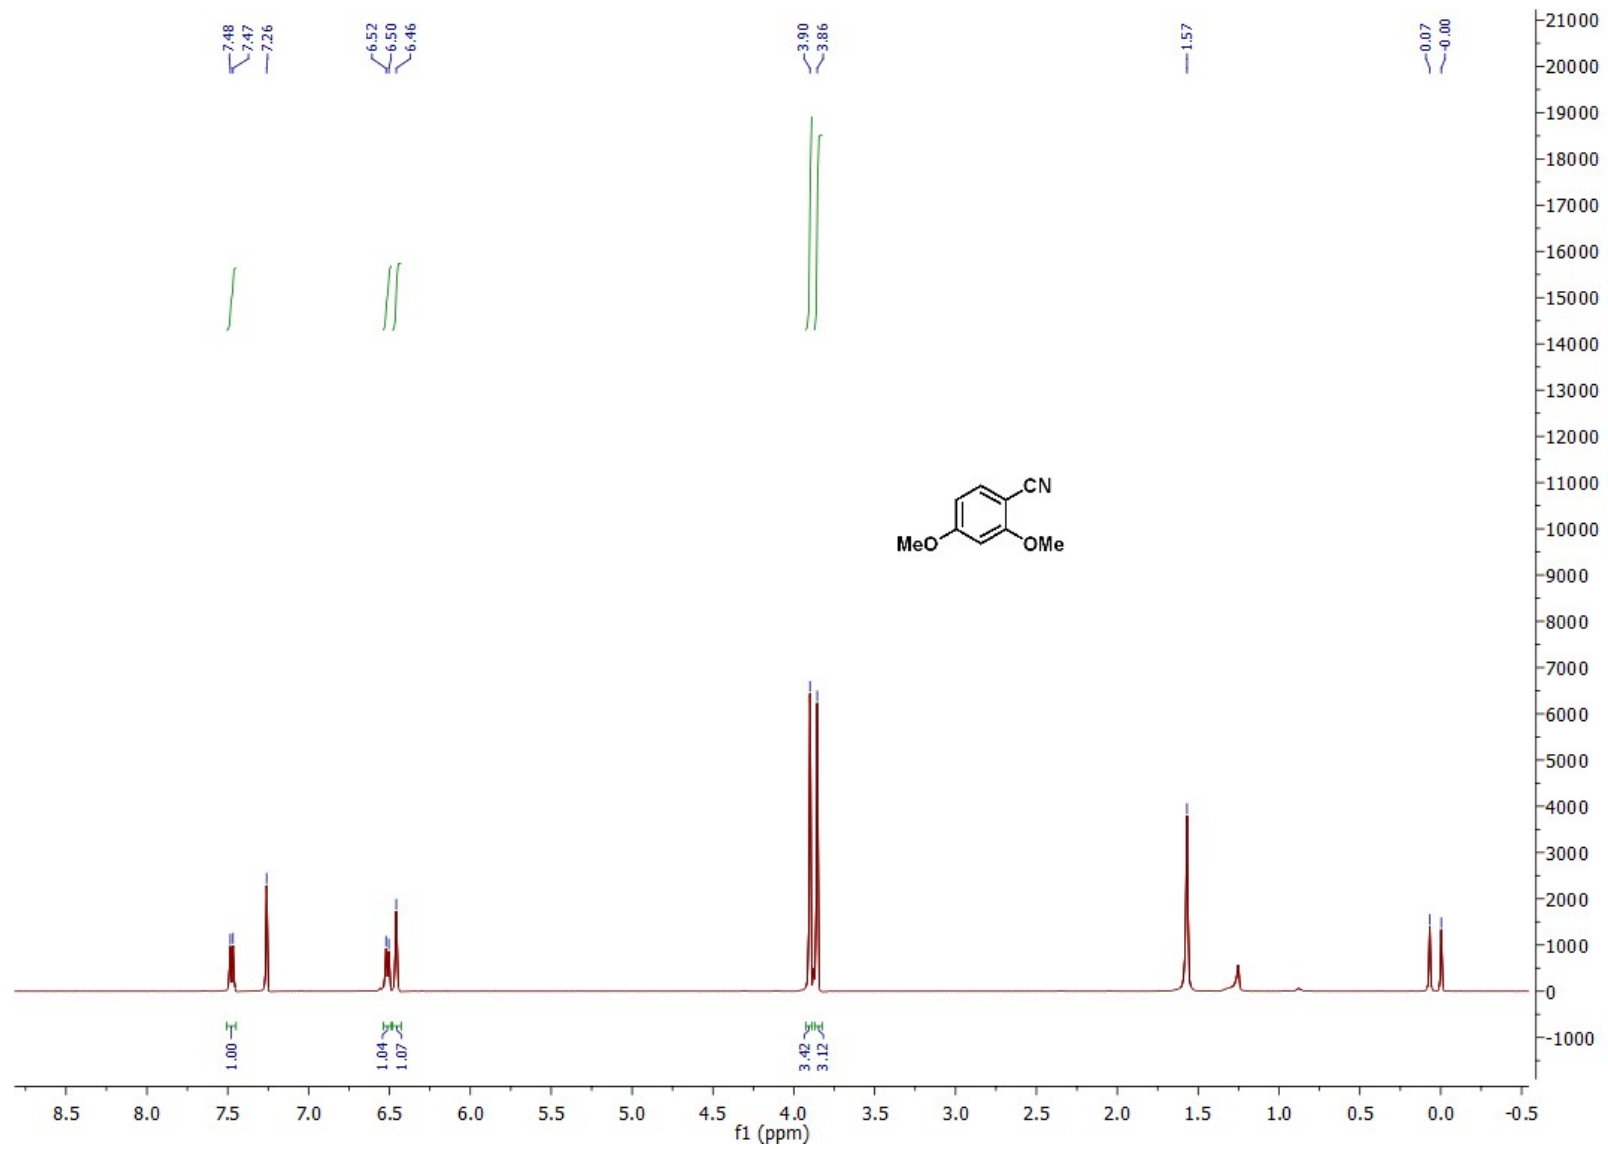

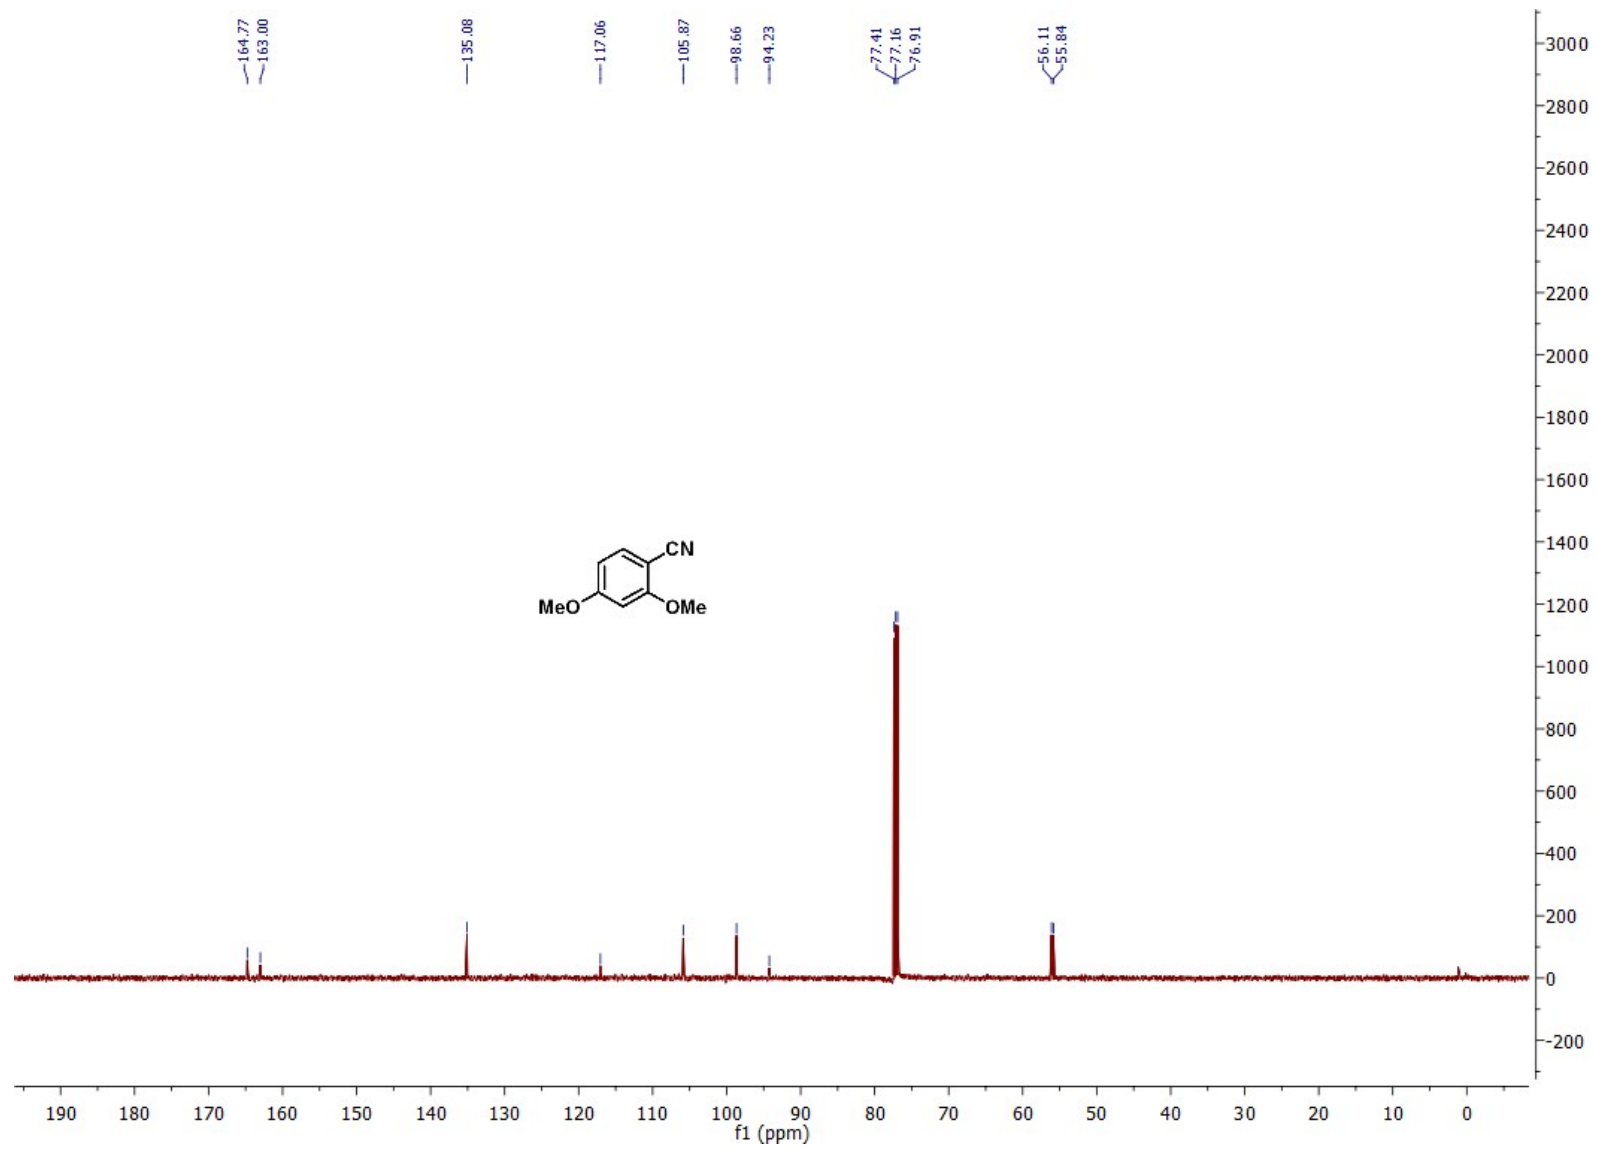

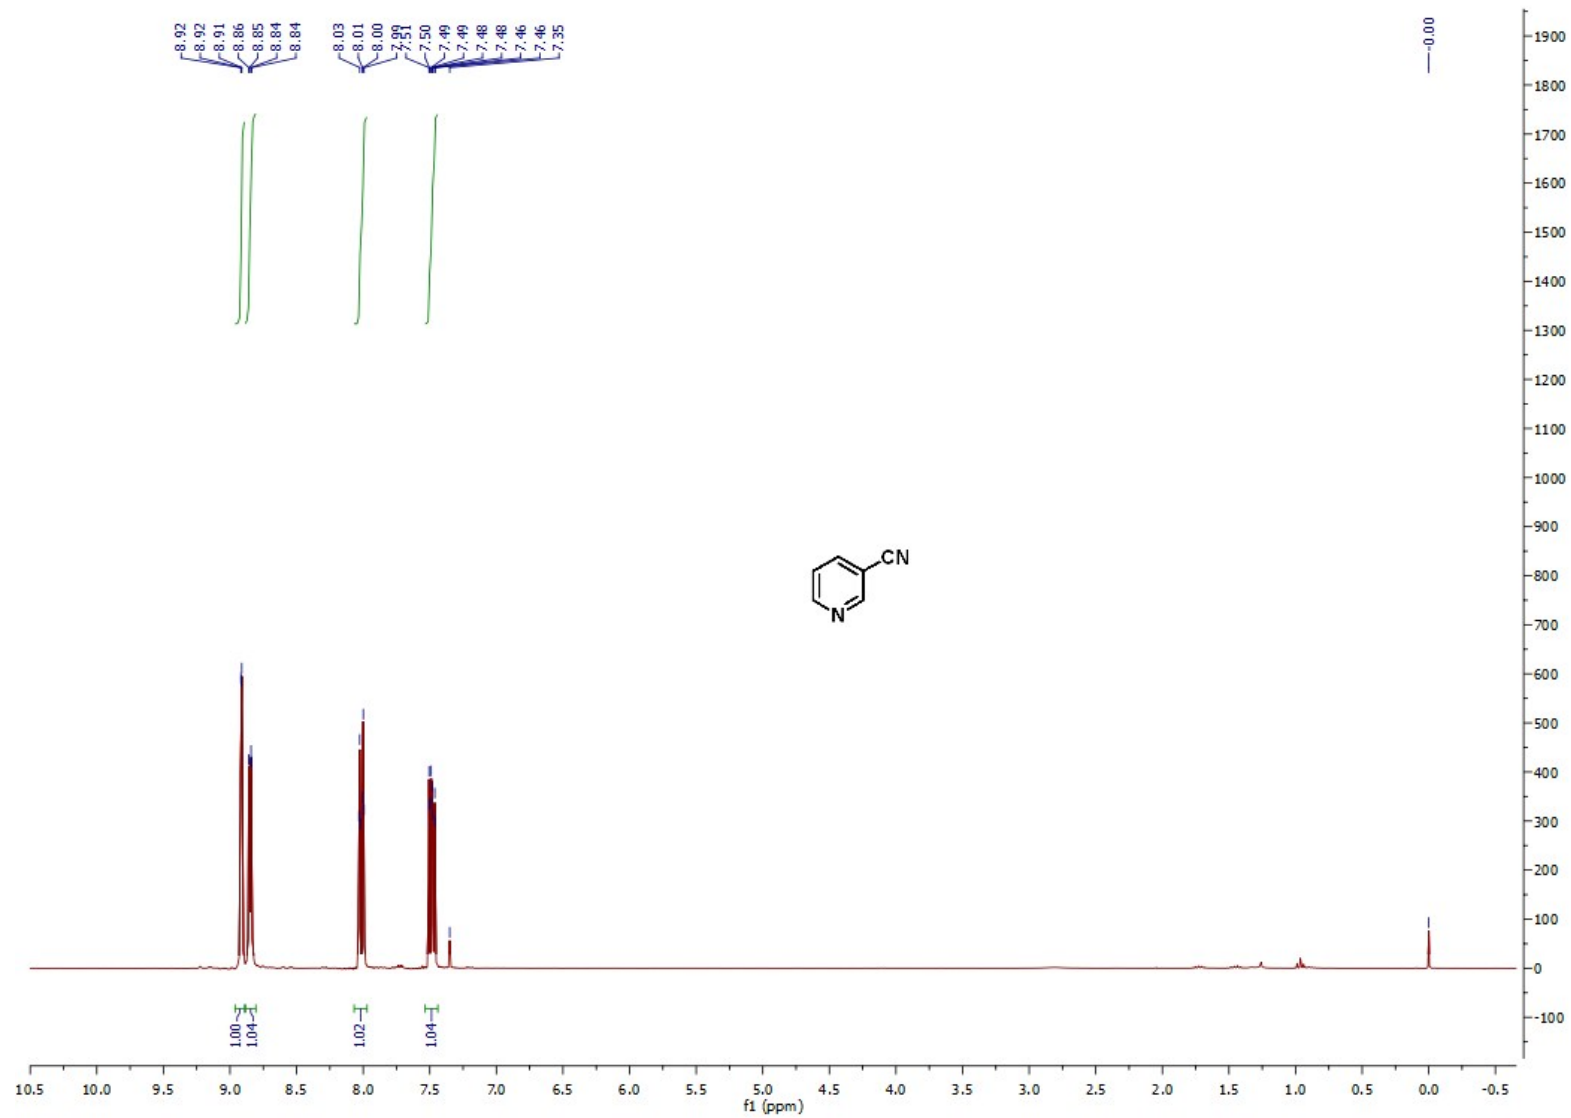



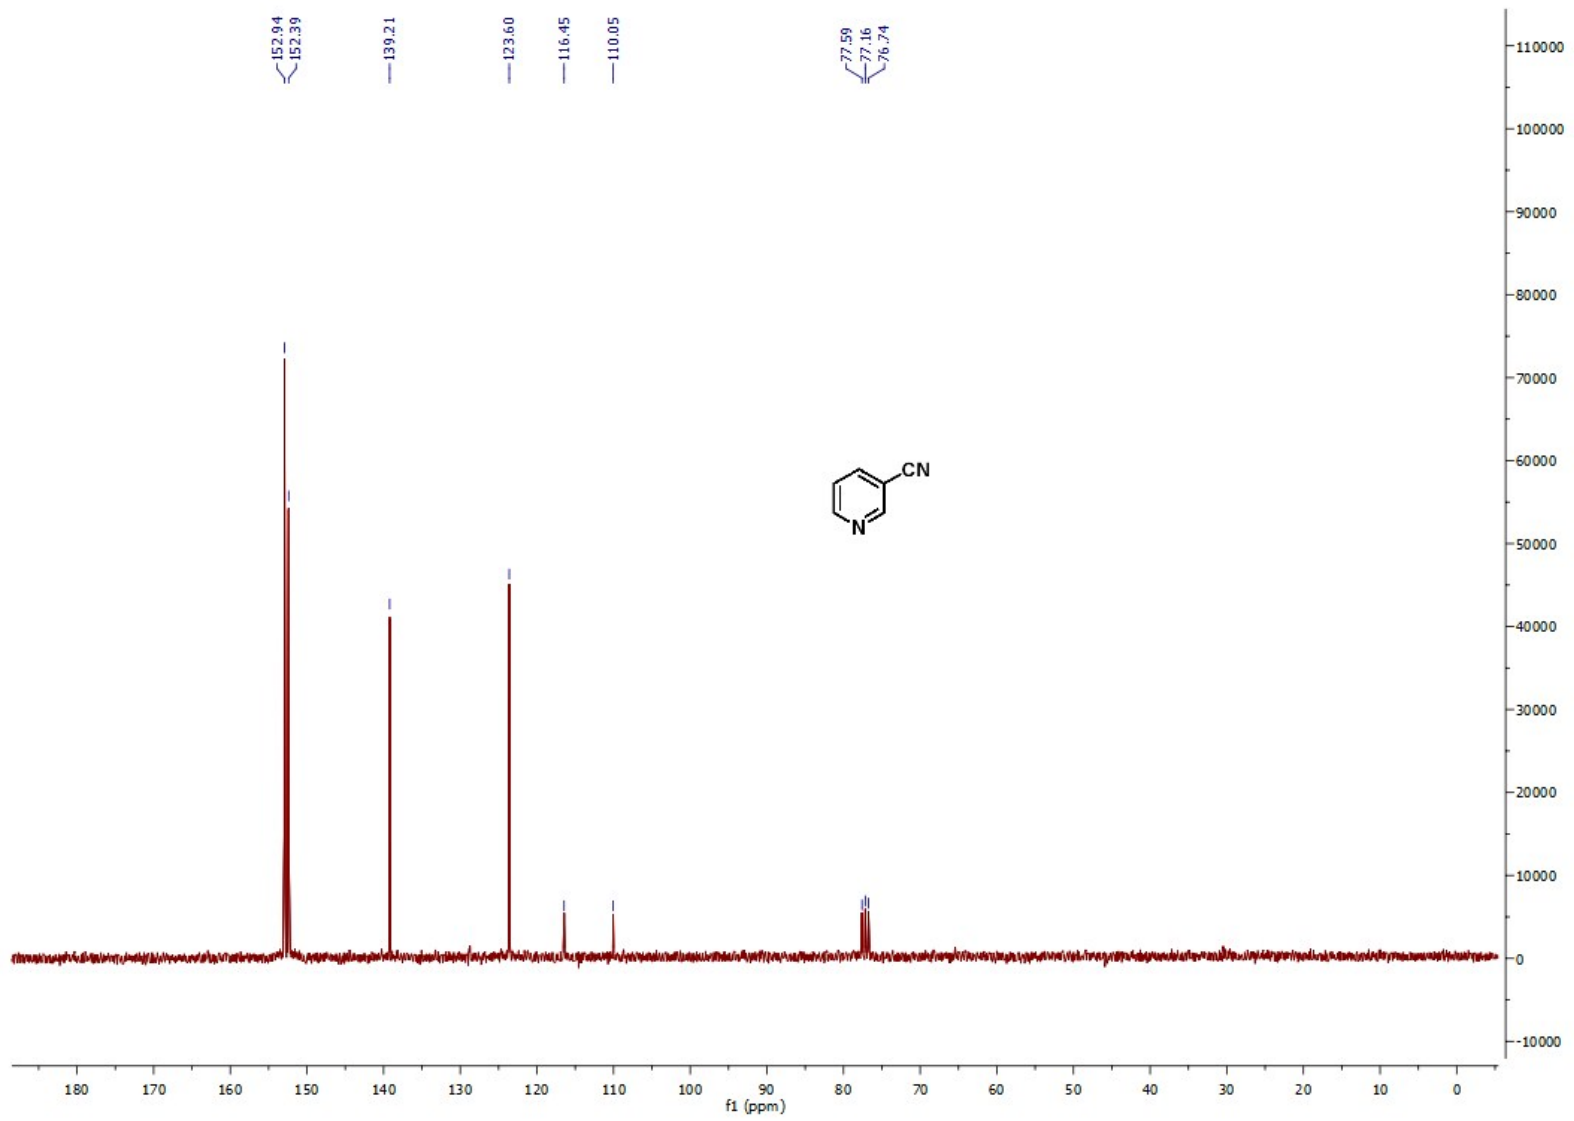

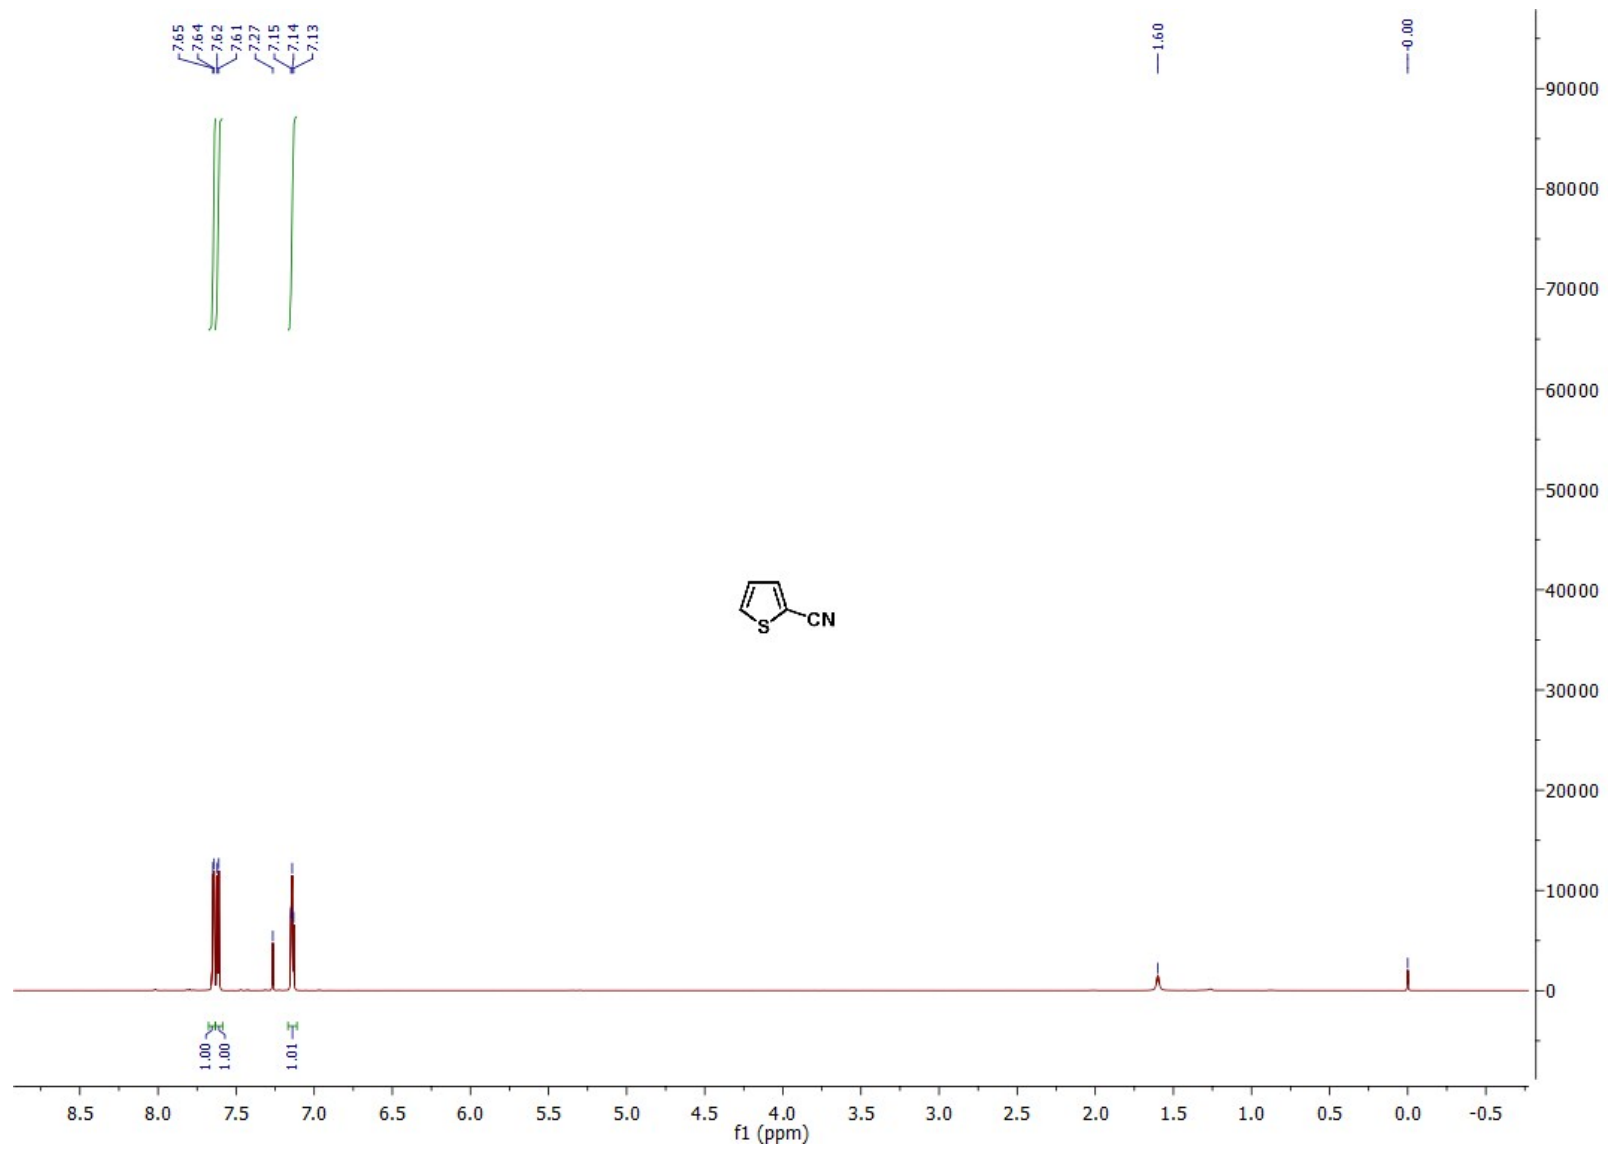

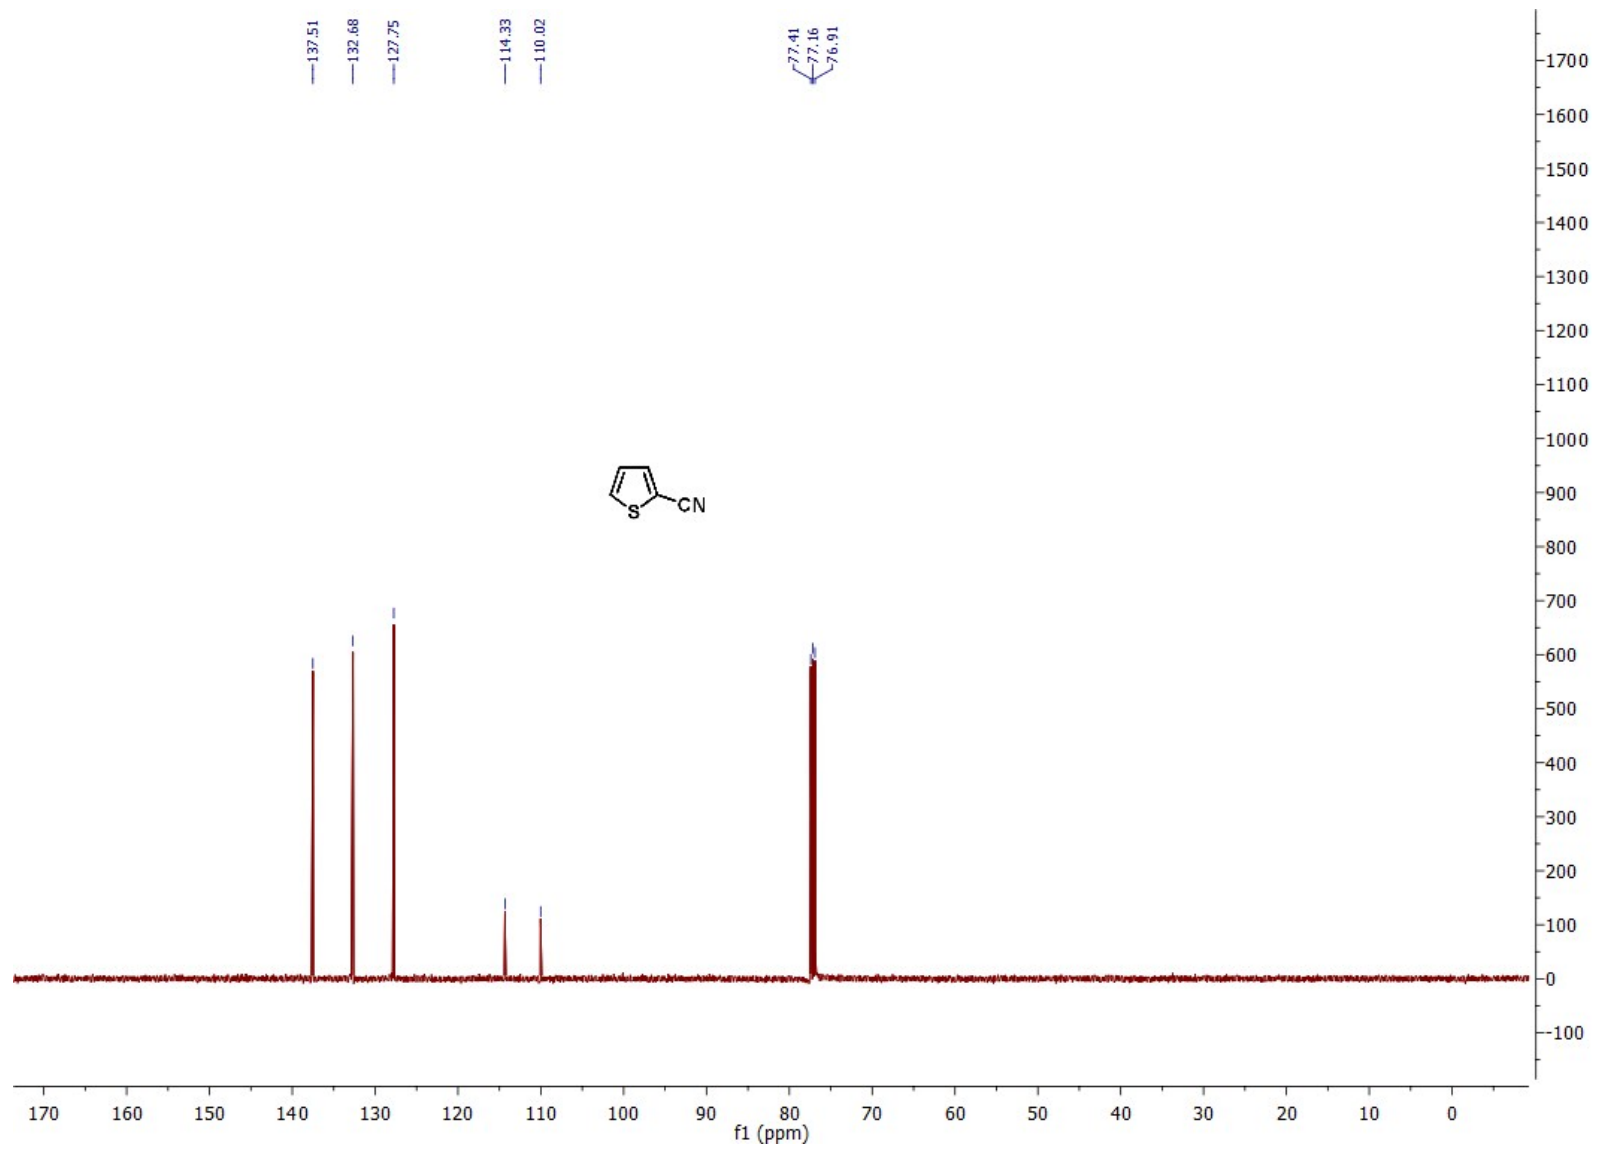

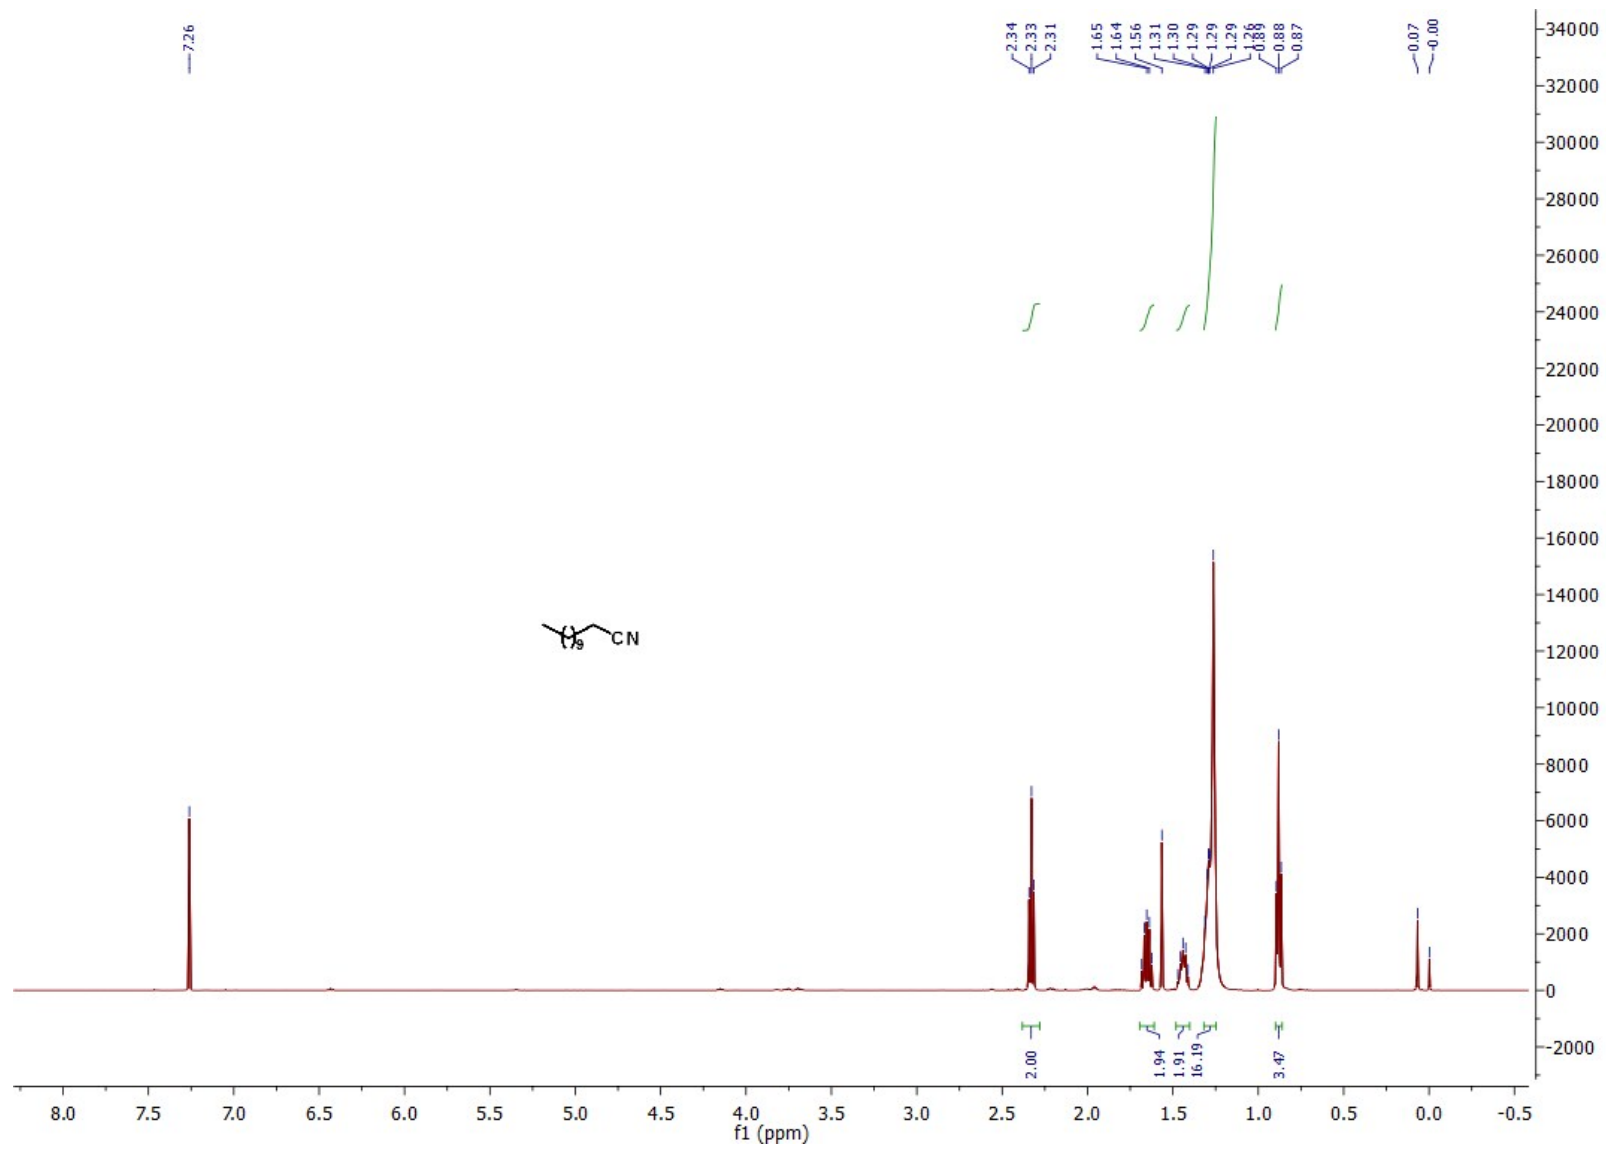

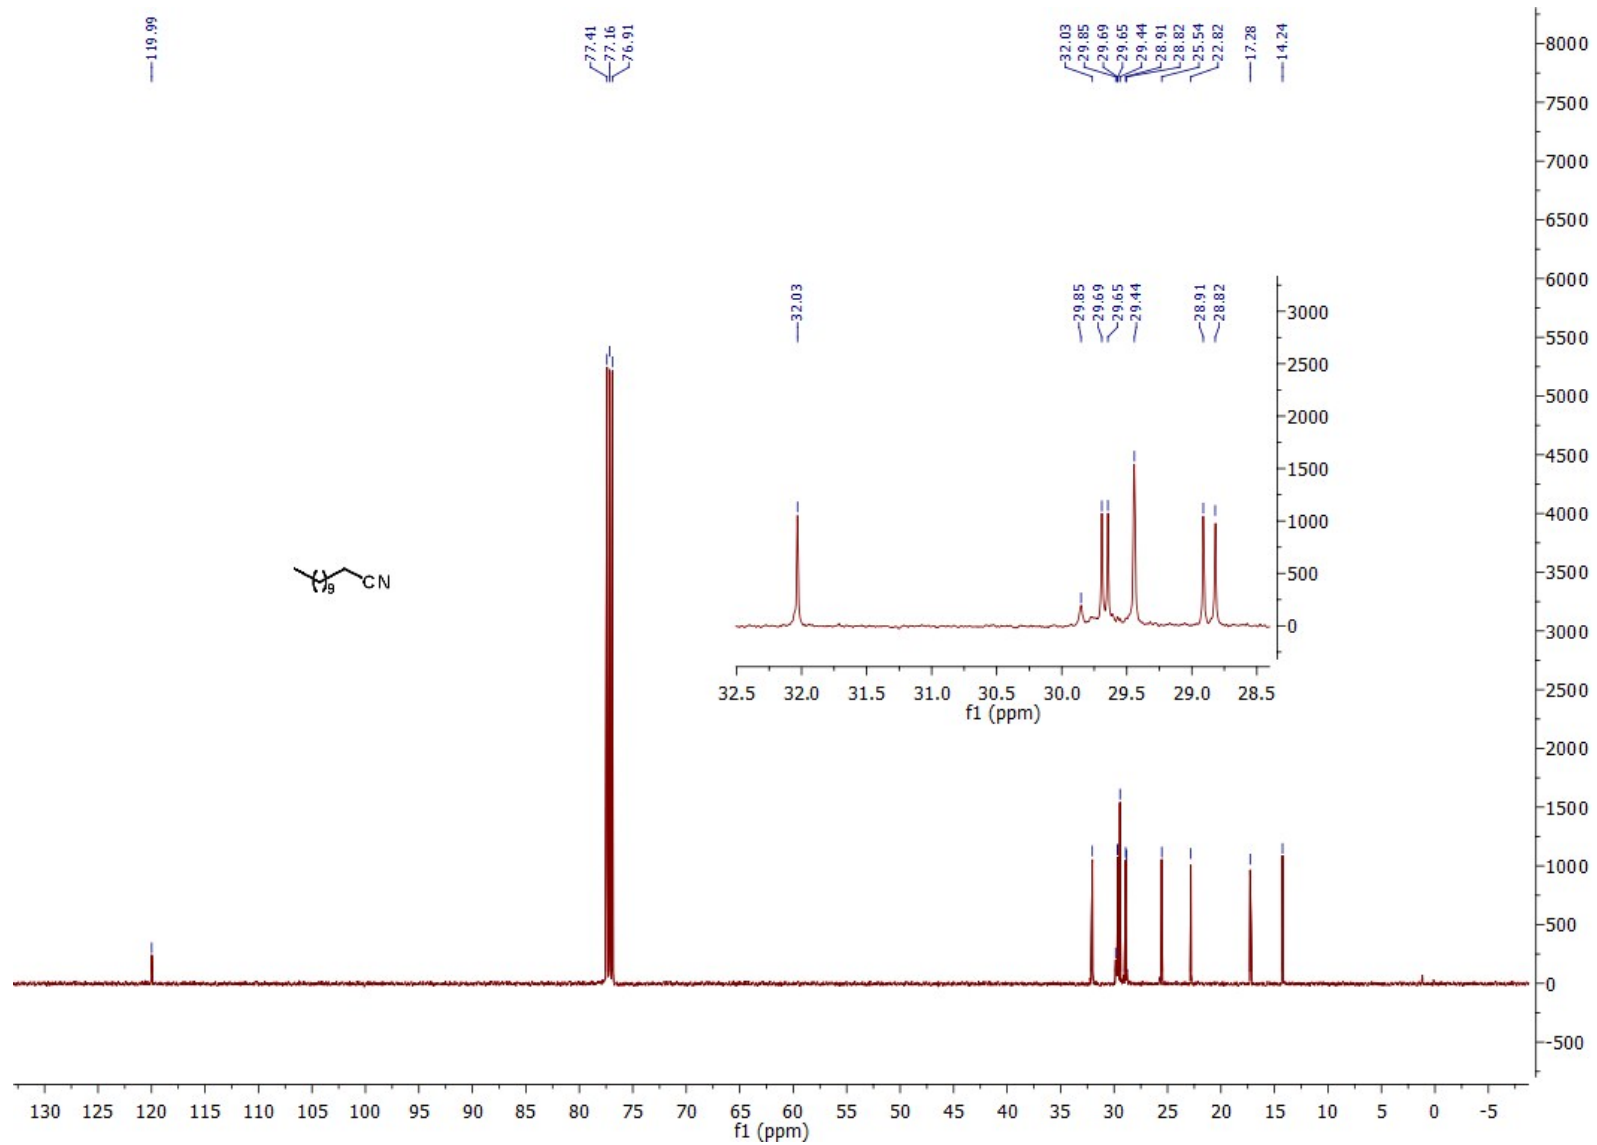

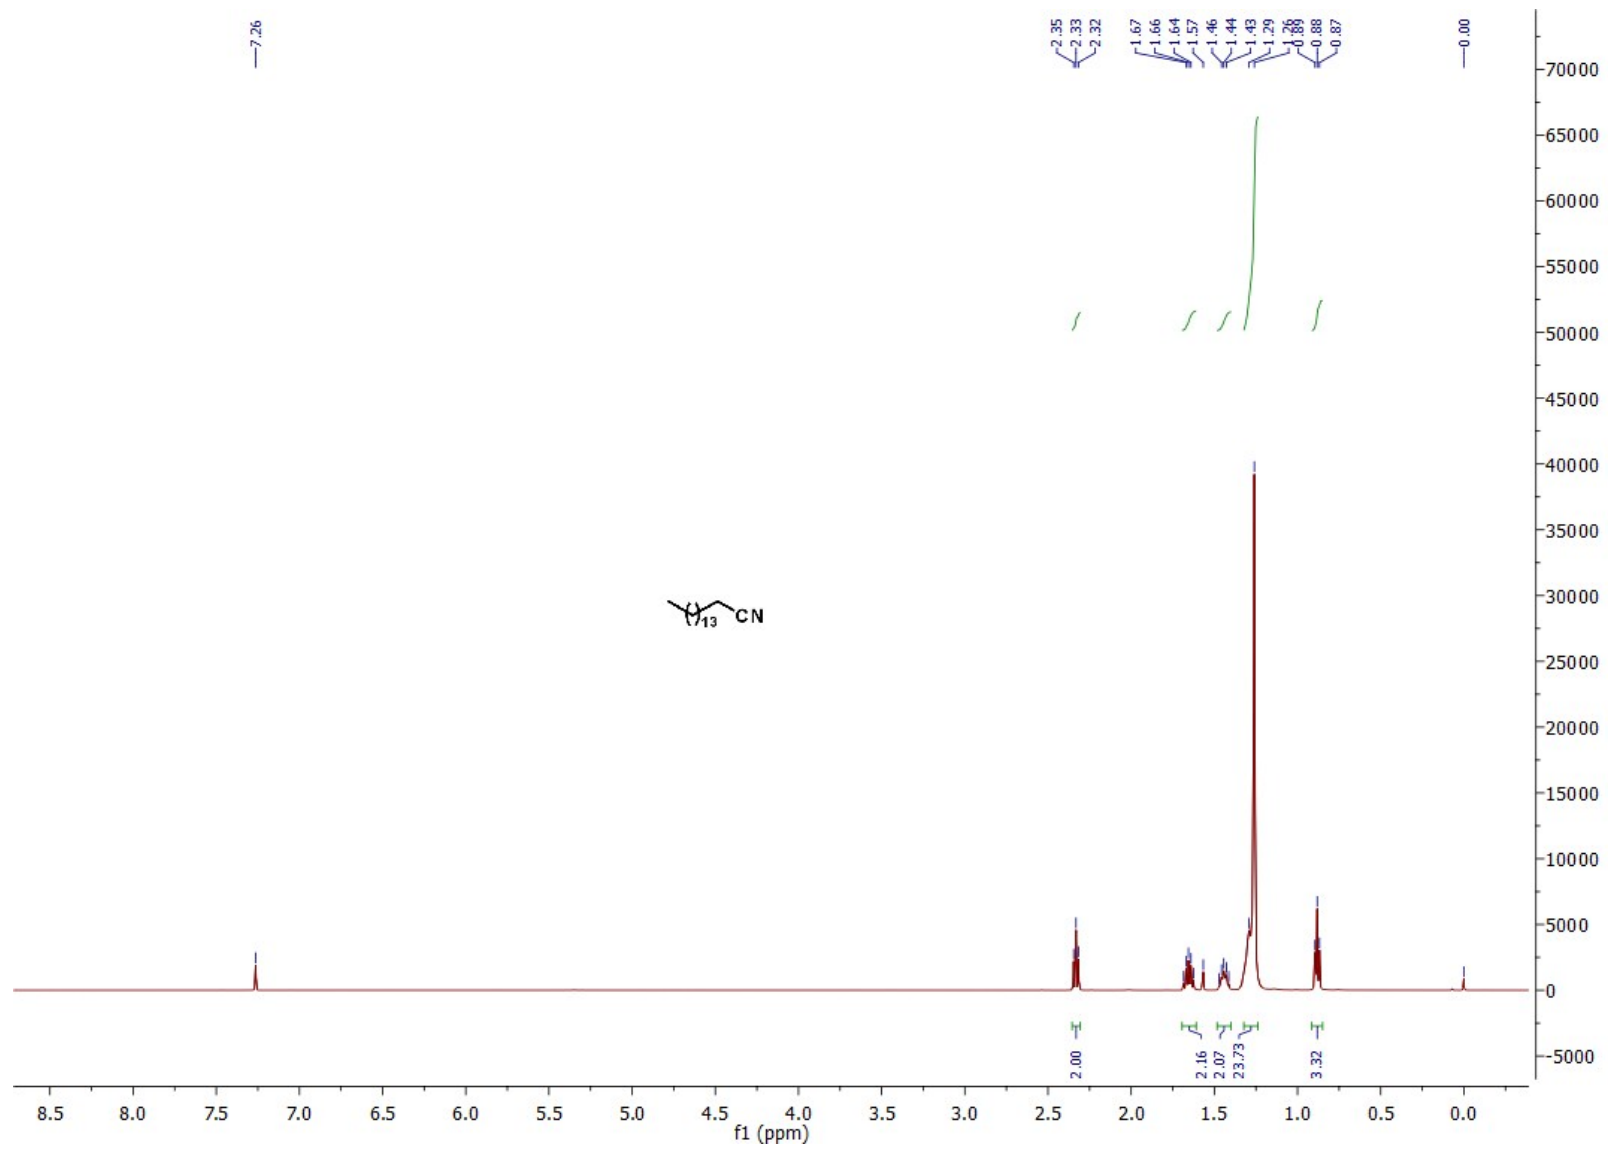

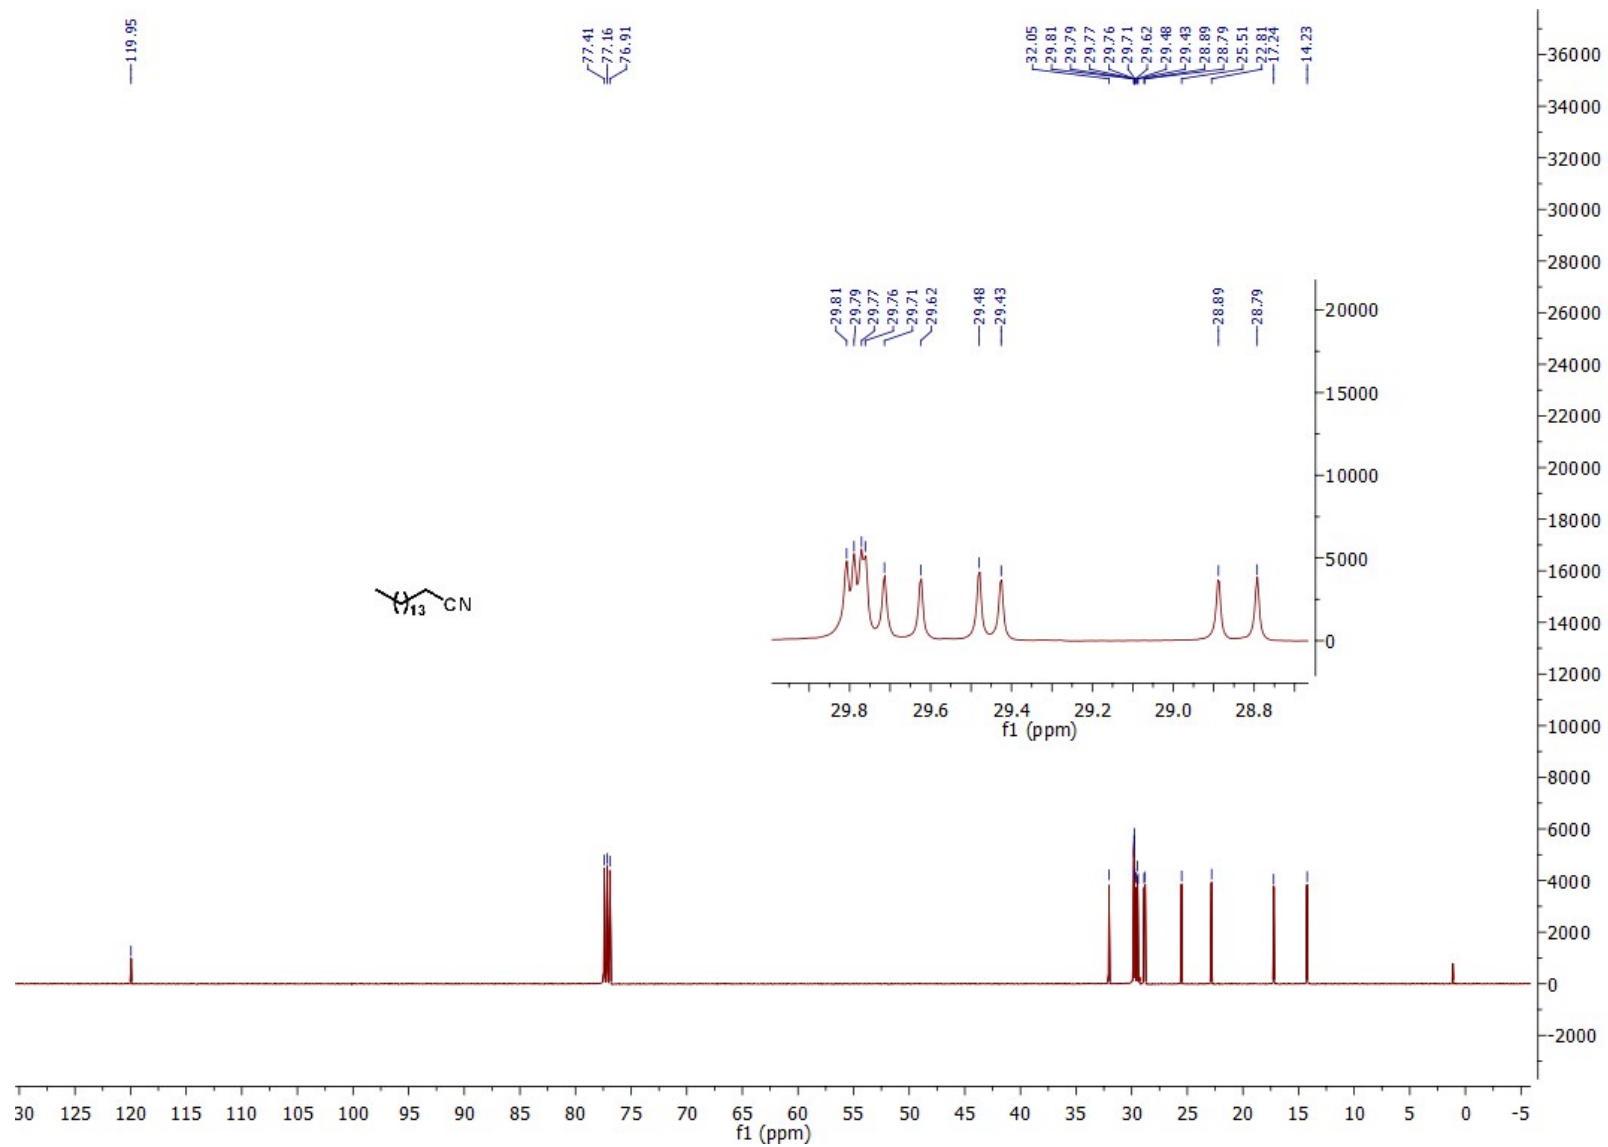

Supplement: c6ob02510b1.pdf [file c6ob02510b1.pdf]
